# Supplementary material for: Contribution of Cold Starts to Real-World Trip Emissions for Light-Duty Gasoline Vehicles
Source: MDPI journal article supplement (doi:10.3390/atmos14010035), 2022-12-24
Supplement: s1 [file s1]

Archive with 1 entries (1 files):
- atmosphere-2092933-supplementary.pdf
