# Supplementary material for: Contribution of Cold Starts to Real-World Trip Emissions for Light-Duty Gasoline Vehicles
Source: MDPI journal article supplement (doi:10.3390/atmos14010035), 2022-12-24
Supplement: s1 [file s1 › atmosphere-2092933-supplementary.pdf]

# Contribution of Cold Starts to Real-World Trip Emissions for Light-Duty Gasoline Vehicles

Jiangchuan Hu <sup>1</sup>, H. Christopher Frey <sup>2,\*</sup>, and Behdad Yazdani Boroujeni <sup>3</sup>

The supporting information includes: Details of hot-stabilized routes, driving cold start route, instruments, data analysis and quality assurance; Summary of vehicle characteristics and ambient conditions during measurement; Idle cold start durations for each measured vehicle; Time to accumulate 90% of idle cold start increment; Driving cold start increments for the five measured vehicles; Cold start emissions for the “five and drive” scenario; Relationship between vehicle characteristics and ambient conditions versus idle cold start durations, idle cold start increments, and idle cold start CSCs; Cold start contributions for emissions of CO<sub>2</sub>, CO, HC, and NO<sub>x</sub> for Routes A, C, 1, and 3; Cold start equivalent distances.

## Hot-Stabilized Routes in Raleigh and Research Triangle Park Area

The hot-stabilized running measurement was conducted in the Raleigh and Research Triangle Park (RTP) area, NC [37]. Each vehicle was driven for 110 miles on four two-way routes, shown in Figure S1. Routes A and C are alternative paths between North Carolina State University (NCSU) and North Raleigh (NR), and Routes 1 and 3 are alternative paths between NR and RTP. Route A has approximately 10.1 miles for each of outbound and inbound trips. Route A includes all local roads, such as Hillsborough St., W. Morgan St., Capital Blvd, and Six Forks Rd. Route C has approximately 11.2 miles for each of outbound and inbound trips. Route C includes a portion of highway Interstate 440 and a portion of local roads such as Hillsborough St. and Six Forks Rd. Route 1 has approximately 16.3 miles for each of outbound and inbound trips. Route 1 includes a major portion of Interstate 540 and a small portion of local roads such as six forks Rd. and Davis Dr. Route 3 has approximately 17.6 miles for each of outbound and inbound trips. Route 3 includes all local roads such as saw mill Rd., Lynn Rd., Glenwood Ave., and TW Alexander Dr.

## Driving Cold Start Routes in Raleigh Area

The driving cold start circuit route in Raleigh, NC area is shown in Figure S2. The route is approximately 4.2 miles in length, and the typical driving time is 10 minutes per circuit. The route is comprised of local road such as Clarks Branch Dr., Fairbanks Dr., Pinecrest Rd., Toscana Dr., Glenwood Ave., Ebenezer Church Rd., and Eden Park Dr.

## Instruments Calibration and Validation

Prior to each day of measurement, the portable emission measurement system (PEMS) was calibrated using a BAR 97 High standard gas cylinder. The gas cylinder contains known concentrations of carbon monoxide (CO), hydrocarbon (HC), nitric oxide (NO), carbon dioxide (CO<sub>2</sub>), and oxygen (O<sub>2</sub>). During the measurements, the two gas analyzers periodically zeroed every 10 minutes on a staggered schedule using ambient air to prevent drift.

Battelle compared the exhaust concentrations between the same model PEMS and reference method instruments based on dynamometer tests [38]. The cycle average emission rates for CO<sub>2</sub>, CO and nitrogen oxides (NO<sub>x</sub>) were within 10% between these methods. The HC emission rates from NDIR are lower than for the reference method by a factor of approximately two. This bias for HC emission rates was expected because non-dispersive infrared (NDIR) is known to respond well to straight-chain alkanes but not for other

types of HC, whereas the reference flame ionization detection (FID) method better characterizes total HC [40,41]. However, FID requires a hydrogen fuel source which is a potential safety concern for on-board measurements. Therefore, the FID method was not used.

### Data Synchronization, Analysis, and Quality Assurance

For both cold start and hot-stabilized measurements, the measured emission concentrations from PEMS and engine activity from on-board diagnostics (OBD) were time-aligned prior to emission rates analysis. The exhaust concentrations were time-aligned with OBD first, using concentration of CO or NO from PEMS and engine speed from OBD as indicators. The cold start period starts when the engine starts.

For quality assurance, the combined data set for a vehicle run was screened to check for errors or possible problems. NCSU has developed a PEMS quality assurance software in LabVIEW. Raw data from the PEMS runs through this software to identify data quality problems. Where possible, such problems are corrected. If correction is not possible, then the errant data are omitted from the final database used for analysis [43].

Typical errors include both gas benches zeroing and unusual air to fuel ratio (AFR). During measurement, the two gas benches in the PEMS were zeroed every 10 minutes. While zeroing, the gas bench intakes ambient air instead of tailpipe exhaust to prevent instrument drift. Data during the zeroing process were not used for analysis. Whenever both two gas benches were zeroing, there was no valid data for that period. Unusual AFR was defined when the AFR value exceed a threshold, which is typically 150. When the AFR exceeds 150, there could be fuel cut-off.

### Emission Rates Estimates

Emission rates were estimated at 1 Hz for cold start and hot stabilized driving. For 26 out of 37 vehicles, the 1 Hz exhaust flow rates were estimated based on mass fuel flow (MFF), mole fractions of CO<sub>2</sub>, CO, and HC in the exhaust, and molecular weight of fuel [43,44]. For the other 10 vehicles, neither MFF nor mass air flow (MAF) was reported. For these vehicles, the speed-density method was used to estimate MAF based on the ideal gas law, taking into account engine speed in revolutions per minute (RPM), manifold absolute pressure (MAP), intake air temperature (IAT), engine displacement, engine compression ratio, and volumetric efficiency (VE) [43,44,49,50]. VE is the ratio of actual to theoretical mass flow. AFR was inferred from the measured exhaust gas concentrations, and MFF was subsequently estimated using estimated MAF and AFR. VE was calibrated so that the total estimated MFF was equal to the actual fuel consumption subject to a constraint that VE is less than or equal to 0.95. Exhaust flow rates were then estimated. For all vehicles, based on estimated exhaust flow rate, mole fraction of each pollutant in the exhaust, and molecular weight for each pollutant, time-based emission rates were estimated.<sup>S1</sup>

For each of the 37 measured vehicles, the actual fuel use was compared with the estimated fuel use. The actual fuel use was recorded at the gas station. The estimated fuel use was calculated based on modal fuel use rates in each of the VSP modes and the distribution of time in each VSP mode based on the vehicle's measured driving cycle. Table S2 summarizes the actual fuel use, estimated fuel use, and the ratio of actual to estimated fuel use for each of the vehicles. On average of all 37 measured vehicles, the ratio of actual to estimated fuel use was  $1.02 \pm 0.02$ , which is an indication that the estimated fuel use was in good quality.

The 95% confidence intervals (CIs) on the mean of measured cold start increments for the 37 vehicles are shown in main paper Table 1. The lower bound of the 95% CIs for some pollutant would be smaller than 0 if estimated analytically based on mean, standard deviation, and sample size, which is physically impossible. Therefore, these 95% CIs are based on bootstrap [51].

### Measured Cold Start Vehicles

Idling cold starts were measured for 37 LDGVs, including 18 passenger cars (PCs) and 19 passenger trucks (PTs), as shown in Table S1. PCs include sedans and coupes. PTs include sport utility vehicles (SUVs), pickups, and minivans. These vehicles include 2000 to 2016 model years, 1.4 liter to 5.3 liter engines, 1,070 kg to 2,520 kg curb weights, and 54 miles to approximately 157,000 miles accumulated driving. For each vehicle, an idle cold start measurement was conducted. Ambient temperature for the cold start measurements ranged from 30 °F to 90 °F, and relative humidity ranged from 30% to 100%.

Five of the 37 LDGVs were also measured for driving cold start. These five vehicles include a 2014 Ford Focus, a 2015 Ford Fusion, a 2015 Chevrolet Tahoe, a 2015 Ford F150, and a 2016 Kia Sedona.

### Cold Start Duration

Table S3 summarizes the fuel use, CO, HC, NO<sub>x</sub>, and CO<sub>2</sub> cold start duration and corresponding scenario categories for each vehicle based on idle cold start measurement. These are quantified based on the scenarios described in the main paper. For the 37 vehicles, the average cold start durations, plus or minus 95% confidence intervals, for fuel use, CO emissions, HC emissions, NO<sub>x</sub> emissions, and CO<sub>2</sub> emissions are 690±100 seconds, 340±110 seconds, 330±110 seconds, 390±130 seconds, and 690±100 seconds, respectively.

Table S4 summarizes the cold start duration to accumulate 90% of the cold start increment. Most of the cold start increment accrues soon after the engine start. The time need to accumulate 90% of the cold start increments were used and discussed in the main paper. For example, the time need to accumulate 90% of the cold start increments, plus or minus a 95% confidence interval, for fuel use, CO emissions, HC emissions, NO<sub>x</sub> emissions, and CO<sub>2</sub> emissions are 400±80 seconds, 150±70 seconds, 330±100 seconds, 120±70 seconds, and 400±80 seconds, respectively. Because most of the cold start durations shown in Table S3 were 900 seconds (as quantified in Scenario 2), it is difficult to correlate factors that may have effect on cold start duration. The cold start duration to accumulate 90% of cold start increment is used to evaluate the effect of engine displacement, vehicle mileage, ambient temperature, and relative humidity on the cold start durations, as shown later in Figures S3 through S6.

### Driving Cold Start Increments

Table S5 summarizes fuel use, CO, HC, NO<sub>x</sub>, and CO<sub>2</sub> emissions for the five vehicles that were measured for driving cold start. Each vehicle was driven on a circuit route (shown in Figure S2) immediately after engine start, followed by one or more circuits on the same route. The first circuit is cold start circuit and the following are hot-stabilized circuits. The trip total emissions for the cold start circuit and for the average of hot-stabilized circuits are summarized in Table S5 for each vehicle. The driving cold start increments are estimated as the difference in trip total emissions between cold start circuit and hot-stabilized circuit averages.

The CO driving cold start increment is higher than the idle cold start increment by a factor of 4, with an inter-vehicle range of 0.9 to 25. The HC driving cold start increment was greater than the idle cold start increment by an average factor of 2.1 with an inter-vehicle range of 0.1 to 3.6. The NO<sub>x</sub> driving cold start was higher than that for idle cold start by an average factor of 10.2, with an inter-vehicle range of 5.0 to 85.

The driving cold start increments can be evaluated by comparing the cold start lap and hot-stabilized lap total emissions. On average of the 5 vehicles, the average fuel use driving cold start increment was 56 grams. The average hot-stabilized lap total fuel use was 644 grams. Thus, the average fuel use driving cold start increment was equivalent to approximately 0.09 laps of hot-stabilized driving. Similarly, the average CO driving cold start increment was 7.0 grams, which was equivalent to approximately 3.3 laps of hot-stabilized driving. The average HC driving cold start increment was 0.73 grams, which

was equivalent to approximately 8.5 laps of hot-stabilized driving. The average NO<sub>x</sub> driving cold start increment was 0.79 grams, which was equivalent to approximately 2.9 laps of hot-stabilized driving.

Figures S3 to S4, S7 to S8, S9 to S10, S11 to S12, and S13 to S14 show the engine variables and measured exhaust concentrations versus distance for the Ford Focus, the Ford Fusion, the Chevrolet Tahoe, the Ford F150, and the Kia Sedona, respectively. The purpose of these figures is to compare the driving cold start versus the hot-stabilized operation for the same route. For all five vehicles, the speed versus distance profiles are approximately the same for the cold start and hot-stabilized laps, indicating repeatability of the driving cycle. The catalyst reached light-off temperature during the cold start lap. Thus, the cold start typically end within the cold start lap. For the exhaust flow rates and the fuel use rates, typically the cold start lap has similar rates compared to the hot-stabilized rates, but there are several points at which the rates in the cold start lap are higher than for the hot-stabilized lap. Concentrations of CO, HC, and NO<sub>x</sub> were significantly higher for the cold start lap compared to the hot-stabilized lap, particularly at the beginning of the cold start lap as well as for several seconds of higher concentrations at different locations during the lap for some vehicles prior to the catalyst reaching light-off temperature. Overall, the higher fuel use and emission rates for the driving cold start compared to hot-stabilized operations are a result of significant higher exhaust concentrations in combination with slightly higher exhaust flow rates.

Figures S5 and S6 show the different engine variables and measured exhaust concentrations versus distance for the Ford Focus during the “five-and-drive” measurement. For this case, the vehicle was idled for five minutes, prior to being driven on the cold start lap. Table S6 shows the measured fuel use and emissions for 3 different cold start scenarios for the 2014 Ford Focus: five-and-drive, 15 minutes idling, and driving. Based on comparing the total emissions during the five minutes of idling and the increment during driving, the “five and drive” case had approximately half the CO, a third of the HC, and a quarter of the NO<sub>x</sub> emissions compared to the driving case. However, because of the five minutes of no driving, the total fuel use and CO<sub>2</sub> emissions attributed to the start during the “five and drive” case was approximately twice as high as for driving. Thus, a hybrid start strategy of idling followed by driving can help reduce exhaust emissions of some pollutants with the tradeoff of more fuel consumption and higher greenhouse gas emissions.

### Factors Affecting Cold Start Duration and Increment

To evaluate factors that may affect cold start duration and increment, Figures S15 through S18 summarize the relationship between idle cold start duration to accumulate 90% of idle cold start increment and each of engine displacement, mileage, temperature, and relative humidity, respectively. Figures S19 through S22 summarizes the relationship between cold start increments and each of engine displacement, mileage, temperature, and relative humidity, respectively.

The idle cold start duration for NO<sub>x</sub> emissions to accumulate 90% of the cold start increment is weakly proportional to vehicle mileage, with a statistically significant R<sup>2</sup> of approximately 0.22, but is not sensitive to engine displacement, temperature, or relative humidity. For fuel use, CO and HC, no statistically significant relationships were found with respect to engine displacement, age, mileage, temperature, and relative humidity.

The cold start fuel use increments significantly increase as ambient temperature decreases, but are not significantly correlated with engine displacement, age, mileage, or relative humidity. Cold start HC increments significantly increase with increasing engine displacement, but are not sensitive to mileage or ambient conditions. Cold start CO and NO<sub>x</sub> increments significantly increase with increasing mileage and decrease with ambient temperature, but are not significantly sensitive to engine displacement or relative humidity. Trends in these significant relationships with ambient temperature agree with previous studies [6,13]. However, since the ambient temperature range in this study were bounded to above -1 °C while the previous study controlled the ambient temperature to

as low as  $-20\text{ }^{\circ}\text{C}$ , the relationship between cold start increments and temperature here may be weak. The key factors that affect the cold start increments of fuel use and emissions of particular pollutants may differ.

### Cold Start Contributions for All Measured Vehicles

To evaluate factors that may effect idle cold start contributions, Figures S23 through S26 summarize the relationship between idle cold start contribution and each of engine displacement, mileage, temperature, and relative humidity, respectively.

The idle CSCs for  $\text{CO}_2$ , CO, and HC emissions are weakly negatively proportional to ambient temperature with a statistically significant  $R^2$  of approximately 0.22, 0.25, and 0.22, respectively, but are not sensitive to engine displacement, mileage, or relative humidity. For  $\text{NO}_x$ , no statistically significant relationships were found with respect to engine displacement, age, mileage, temperature, and relative humidity.

To evaluate idle cold start contribution for the vehicles for measured idle cold start, Figures S27 through S30 show cumulative distribution functions of the estimated CSCs averaged over outbound and inbound trips for each of Route A, C, 1, and 3, respectively. Each data point represents one vehicle. On average of all vehicles, Route A has the highest average CSCs for CO, HC,  $\text{NO}_x$ , and  $\text{CO}_2$ , which are 59%, 63%, 24%, and 5.5%, respectively. Route 1 has the lowest average CSC of 40% for CO and Route 3 has the lowest average CSCs of 41%, 14%, and 3.4% for HC,  $\text{NO}_x$ , and  $\text{CO}_2$ , respectively.

Figure S31 summarizes the idle cold start contribution based on 15 minutes idle total emissions and hot-stabilized trip total emissions. On average of all vehicles, the CSCs averaged  $48\%\pm 9\%$  for CO,  $52\%\pm 7\%$  for HC,  $19\%\pm 6\%$  for  $\text{NO}_x$ , and  $16\%\pm 1\%$  for  $\text{CO}_2$ . For CO, HC, and  $\text{NO}_x$ , the idle CSCs based on 15 minutes idle total emissions are approximately the same compared to the idle CSCs based on only idle cold start increments, within 3 percentage points. For  $\text{CO}_2$ , the CSCs based on 15 minutes idle total emissions are significantly higher compared to the CSCs based on only idle cold start increments. The amount of  $\text{CO}_2$  emitted during the 15 minutes idling comprises a significant proportion of trip total  $\text{CO}_2$  emissions.

### Cold Start Equivalent Distance for All Measured Vehicles

Cold start equivalent distance (CSED) can be developed to supplement CSC. The idle CSED was estimated based on the ratio of idle cold start increment to the average hot-stabilized emission rate per one km of vehicle travel. Similarly, the driving CSED was estimated based on the ratio of driving cold start increment to the average hot-stabilized emission rates per one km of vehicle travel.

The CO, HC,  $\text{NO}_x$ , and  $\text{CO}_2$  idle CSEDs, on average of all vehicles, range from 140 km to 470 km, 40 km to 160 km, 5.6 km to 13 km, and 0.93 km to 1.1 km, respectively, depending on the route. For some vehicles, the one-way route total hot-stabilized emissions are very low, such that the cold start increment contributes a large proportion of total emissions. Thus, the idle CSED can be very high for some cases. The differences in route distance and route typical traveling speed are key reasons for differences in hot-stabilized trip emissions, which lead to differences in idle CSEDs. On average of all vehicles and all routes, the idle CO and HC cold start increments are each equivalent to a hot-stabilized driving distance of approximately 20 km. The idle  $\text{NO}_x$  cold start increments are equivalent to a hot-stabilized distance of approximately 5.5 km.

For the vehicles with both driving and idling cold start measurements, the driving CO, HC,  $\text{NO}_x$ , and  $\text{CO}_2$  CSEDs were higher compared to idling CSEDs by average factors of approximately 8.5, 1.5, 8.5, and 2.0, respectively.

**Table S1.** Cold Start Measurement – Summary of Measured Vehicle Year, Make, Model, Test Date, Engine Displacement, Mileage, and Ambient Conditions.

| Year | Make     | Model            | Type <sup>a</sup> | Test Date  | Age | Engine Displacement | Mileage | Amb. Temp. | Relative Humidity |
|------|----------|------------------|-------------------|------------|-----|---------------------|---------|------------|-------------------|
|      |          |                  |                   |            |     | (L)                 | (mile)  | (°F)       | (%)               |
| 2000 | Pontiac  | Grand Prix       | PC                | 2/17/2013  | 13  | 3.8                 | 109,128 | 30         | 37                |
| 2001 | Mazda    | Protégé          | PC                | 2/16/2013  | 12  | 2.0                 | 157,245 | 36         | 90                |
| 2004 | Pontiac  | Grand Am GT      | PC                | 2/16/2013  | 9   | 3.4                 | 93,237  | 36         | 92                |
| 2005 | Mazda    | 6                | PC                | 11/11/2012 | 7   | 2.3                 | 79,164  | 73         | 44                |
| 2008 | Honda    | Fit              | PC                | 11/11/2012 | 4   | 1.5                 | 55,531  | 73         | 44                |
| 2008 | Chevy    | Impala           | PC                | 6/9/2013   | 5   | 3.5                 | 98,244  | 79         | 81                |
| 2011 | Chevy    | HHR              | PC                | 12/19/2011 | 0   | 2.2                 | 21,072  | 48         | 52                |
| 2011 | Toyota   | Camry            | PC                | 12/20/2011 | 0   | 2.5                 | 8,827   | 57         | 50                |
| 2012 | Nissan   | Versa            | PC                | 12/16/2011 | 0   | 1.8                 | 615     | 57         | 80                |
| 2012 | Fiat     | 500              | PC                | 1/28/2012  | 0   | 1.4                 | 12,875  | 41         | 50                |
| 2012 | Toyota   | Camry            | PC                | 10/1/2012  | 0   | 2.5                 | 18,752  | 66         | 81                |
| 2012 | Nissan   | Rogue            | PC                | 2/16/2013  | 0   | 2.5                 | 6,980   | 36         | 92                |
| 2012 | Ford     | Fusion           | PC                | 5/29/2013  | 0   | 2.5                 | 26,024  | 86         | 35                |
| 2012 | Dodge    | Avenger          | PC                | 6/21/2013  | 0   | 2.4                 | 38,502  | 90         | 45                |
| 2013 | Chevy    | Impala           | PC                | 2/23/2013  | 0   | 3.6                 | 8,176   | 38         | 60                |
| 2013 | Ford     | Fusion           | PC                | 2/24/2013  | 0   | 2.5                 | 42,966  | 48         | 30                |
| 2014 | Ford     | Focus            | PC                | 3/7/2013   | 2   | 2.0                 | 36,276  | 54         | 64                |
| 2015 | Ford     | Fusion           | PC                | 9/17/2015  | 0   | 2.5                 | 54      | 67         | 70                |
| 2002 | Chevy    | Silverado        | PT                | 11/11/2012 | 10  | 4.8                 | 154,475 | 68         | 38                |
| 2002 | Lexus    | RX300            | PT                | 11/6/2012  | 10  | 3.0                 | 135,784 | 47         | 54                |
| 2002 | Jeep     | Wrangler (1)     | PT                | 11/11/2012 | 10  | 4.0                 | 90,284  | 72         | 36                |
| 2002 | Jeep     | Wrangler (2)     | PT                | 2/16/2013  | 11  | 4.0                 | 136,114 | 42         | 75                |
| 2004 | Toyota   | Tacoma           | PT                | 11/11/2012 | 8   | 4.0                 | 136,211 | 50         | 75                |
| 2004 | Chevy    | Trailblazer      | PT                | 2/16/2013  | 9   | 4.2                 | 99,758  | 41         | 76                |
| 2006 | Dodge    | Caravan          | PT                | 6/1/2013   | 7   | 3.3                 | 123,927 | 86         | 46                |
| 2008 | Nissan   | Xterra           | PT                | 2/16/2013  | 5   | 4.0                 | 47,807  | 36         | 91                |
| 2010 | Chevy    | Silverado        | PT                | 9/17/2012  | 2   | 4.8                 | 26,551  | 79         | 72                |
| 2011 | Ford     | XL150 (1)        | PT                | 9/17/2012  | 1   | 5.0                 | 28,779  | 64         | 97                |
| 2011 | Ford     | XL150 (2)        | PT                | 9/19/2012  | 1   | 5.0                 | 17,208  | 64         | 97                |
| 2012 | Toyota   | Sienna           | PT                | 5/20/2013  | 1   | 3.5                 | 35,376  | 78         | 76                |
| 2013 | GMC      | Yukon            | PT                | 9/29/2012  | 0   | 5.3                 | 4,089   | 63         | 100               |
| 2013 | GMC      | Terrain          | PT                | 5/16/2013  | 0   | 2.4                 | 10,268  | 87         | 66                |
| 2014 | Chrysler | Town and Country | PT                | 9/27/2014  | 0   | 3.6                 | 13,442  | 60         | 90                |
| 2014 | Buick    | Encore           | PT                | 10/26/2014 | 0   | 1.8                 | 12,237  | 60         | 40                |
| 2015 | Chevy    | Tahoe            | PT                | 9/11/2015  | 0   | 5.3                 | 19,213  | 79         | 77                |
| 2015 | Ford     | F150             | PT                | 9/14/2015  | 0   | 5.0                 | 11,960  | 63         | 63                |
| 2016 | Kia      | Sedona           | PT                | 9/19/2015  | 0   | 3.3                 | 103     | 67         | 67                |

<sup>a</sup> Vehicle Type: PC = Passenger Car; PT = Passenger Truck.

**Table S2.** Actual Fuel Use and Estimated Fuel Use for Each Vehicle during the Hot-Stabilized Measurement.

| Year                    | Make     | Model            | Actual Fuel Use | Estimated Fuel Use |
|-------------------------|----------|------------------|-----------------|--------------------|
| 2000                    | Pontiac  | Grand Prix       | 5.516           | 5.121              |
| 2001                    | Mazda    | Protégé          | 3.737           | 4.161              |
| 2004                    | Pontiac  | Grand Am GT      | 4.972           | 4.811              |
| 2005                    | Mazda    | 6                | 4.253           | 4.215              |
| 2008                    | Honda    | Fit              | 4.243           | 3.970              |
| 2008                    | Chevy    | Impala           | 6.122           | 5.586              |
| 2011                    | Chevy    | HHR              | 7.156           | 6.785              |
| 2011                    | Toyota   | Camry            | 4.194           | 3.667              |
| 2012                    | Nissan   | Versa            | 4.392           | 4.380              |
| 2012                    | Fiat     | 500              | 3.963           | 3.590              |
| 2012                    | Toyota   | Camry            | 3.698           | 3.386              |
| 2012                    | Nissan   | Rogue            | 5.215           | 5.056              |
| 2012                    | Ford     | Fusion           | 3.935           | 4.427              |
| 2012                    | Dodge    | Avenger          | 4.251           | 4.457              |
| 2013                    | Chevy    | Impala           | 5.108           | 5.199              |
| 2013                    | Ford     | Fusion           | 3.939           | 4.101              |
| 2014                    | Ford     | Focus            | 3.865           | 3.276              |
| 2015                    | Ford     | Fusion           | 4.990           | 5.071              |
| 2002                    | Chevy    | Silverado        | 6.982           | 6.272              |
| 2002                    | Lexus    | RX300            | 6.220           | 5.917              |
| 2002                    | Jeep     | Wrangler (1)     | 9.709           | 10.659             |
| 2002                    | Jeep     | Wrangler (2)     | 6.978           | 6.679              |
| 2004                    | Toyota   | Tacoma           | 6.489           | 6.261              |
| 2004                    | Chevy    | Trailblazer      | 6.714           | 6.692              |
| 2006                    | Dodge    | Caravan          | 6.307           | 6.567              |
| 2008                    | Nissan   | Xterra           | 7.143           | 6.698              |
| 2010                    | Chevy    | Silverado        | 10.500          | 9.802              |
| 2011                    | Ford     | XL150 (1)        | 9.200           | 9.517              |
| 2011                    | Ford     | XL150 (2)        | 9.000           | 8.865              |
| 2012                    | Toyota   | Sienna           | 5.884           | 5.968              |
| 2013                    | GMC      | Yukon            | 8.421           | 8.233              |
| 2013                    | GMC      | Terrain          | 4.825           | 4.657              |
| 2014                    | Chrysler | Town and Country | 6.094           | 6.065              |
| 2014                    | Buick    | Encore           | 4.365           | 4.474              |
| 2015                    | Chevy    | Tahoe            | n/a             | 6.678              |
| 2015                    | Ford     | F150             | 6.623           | 6.621              |
| 2016                    | Kia      | Sedona           | 5.833           | 5.819              |
| Average                 |          |                  | 5.857           | 5.751              |
| Standard Deviation      |          |                  | 1.811           | 1.841              |
| 95% Confidence Interval |          |                  | 0.613           | 0.623              |

**Table S3.** Cold Start Measurement – Summary of Idle Cold Start Duration and Scenario Categories for Each Vehicle and Each of Fuel Use and Pollutants.

| Year | Make     | Model            | Cold Start Duration (s) <sup>a,b</sup> |     |     |                 |                 | Scenario Category |    |    |                 |                 |
|------|----------|------------------|----------------------------------------|-----|-----|-----------------|-----------------|-------------------|----|----|-----------------|-----------------|
|      |          |                  | Fuel                                   | CO  | HC  | NO <sub>x</sub> | CO <sub>2</sub> | Fuel              | CO | HC | NO <sub>x</sub> | CO <sub>2</sub> |
| 2000 | Pontiac  | Grand Prix       | 900                                    | 220 | 900 | 900             | 900             | 2                 | 1  | 3  | 3               | 2               |
| 2001 | Mazda    | Protégé          | 900                                    | 758 | 900 | 900             | 900             | 2                 | 3  | 3  | 3               | 2               |
| 2004 | Pontiac  | Grand Am GT      | 900                                    | 239 | 270 | 900             | 900             | 2                 | 3  | 1  | 3               | 2               |
| 2005 | Mazda    | 6                | 900                                    | 316 | 900 | 900             | 900             | 2                 | 3  | 3  | 3               | 2               |
| 2008 | Honda    | Fit              | 137                                    | 90  | 130 | 82              | 137             | 1                 | 1  | 1  | 1               | 1               |
| 2008 | Chevy    | Impala           | 330                                    | 76  | 900 | 110             | 330             | 1                 | 1  | 3  | 1               | 1               |
| 2011 | Chevy    | HHR              | 900                                    | 400 | 436 | 900             | 900             | 2                 | 3  | 1  | 3               | 2               |
| 2011 | Toyota   | Camry            | 900                                    | 295 | 578 | 486             | 900             | 2                 | 3  | 1  | 3               | 2               |
| 2012 | Nissan   | Versa            | 900                                    | 900 | 900 | 900             | 900             | 2                 | 3  | 3  | 3               | 2               |
| 2012 | Fiat     | 500              | 900                                    | 81  | 900 | 900             | 900             | 2                 | 1  | 3  | 3               | 2               |
| 2012 | Toyota   | Camry            | 900                                    | 300 | 900 | 150             | 900             | 2                 | 3  | 3  | 1               | 2               |
| 2012 | Nissan   | Rogue            | 550                                    | 900 | 335 | 84              | 550             | 1                 | 3  | 1  | 1               | 1               |
| 2012 | Ford     | Fusion           | 900                                    | 180 | 900 | 50              | 900             | 2                 | 1  | 3  | 1               | 2               |
| 2012 | Dodge    | Avenger          | 400                                    | 900 | 900 | 122             | 400             | 1                 | 3  | 3  | 1               | 1               |
| 2013 | Chevy    | Impala           | 550                                    | 112 | 900 | 900             | 550             | 1                 | 1  | 3  | 3               | 1               |
| 2013 | Ford     | Fusion           | 900                                    | 168 | 273 | 900             | 900             | 2                 | 1  | 1  | 3               | 2               |
| 2014 | Ford     | Focus            | 349                                    | 900 | 900 | 94              | 349             | 1                 | 3  | 3  | 1               | 1               |
| 2015 | Ford     | Fusion           | 38                                     | 41  | 145 | 36              | 38              | 1                 | 1  | 1  | 1               | 1               |
| 2002 | Chevy    | Silverado        | 900                                    | 455 | 900 | 900             | 900             | 2                 | 3  | 3  | 3               | 2               |
| 2002 | Lexus    | RX300            | 900                                    | 330 | 314 | 900             | 900             | 2                 | 1  | 1  | 3               | 2               |
| 2002 | Jeep     | Wrangler (1)     | 337                                    | 52  | 900 | 900             | 337             | 1                 | 1  | 3  | 3               | 1               |
| 2002 | Jeep     | Wrangler (2)     | 900                                    | 90  | 205 | 900             | 900             | 2                 | 1  | 1  | 3               | 2               |
| 2004 | Toyota   | Tacoma           | 522                                    | 255 | 115 | 900             | 522             | 1                 | 3  | 1  | 3               | 1               |
| 2004 | Chevy    | Trailblazer      | 900                                    | 724 | 900 | 900             | 900             | 2                 | 1  | 2  | 3               | 2               |
| 2006 | Dodge    | Caravan          | 900                                    | 900 | 900 | 180             | 900             | 2                 | 3  | 3  | 1               | 2               |
| 2008 | Nissan   | Xterra           | 598                                    | 900 | 900 | 88              | 598             | 1                 | 3  | 3  | 1               | 1               |
| 2010 | Chevy    | Silverado        | 900                                    | 900 | 900 | 900             | 900             | 2                 | 3  | 2  | 3               | 2               |
| 2011 | Ford     | XL150 (1)        | 900                                    | 900 | 900 | 900             | 900             | 2                 | 3  | 2  | 3               | 2               |
| 2011 | Ford     | XL150 (2)        | 900                                    | 900 | 900 | 900             | 900             | 2                 | 3  | 2  | 3               | 2               |
| 2012 | Toyota   | Sienna           | 900                                    | 270 | 900 | 35              | 900             | 2                 | 1  | 3  | 1               | 2               |
| 2013 | GMC      | Yukon            | 300                                    | 788 | 900 | 900             | 300             | 1                 | 1  | 2  | 3               | 1               |
| 2013 | GMC      | Terrain          | 900                                    | 260 | 420 | 35              | 900             | 2                 | 1  | 1  | 1               | 2               |
| 2014 | Chrysler | Town and Country | 900                                    | 395 | 121 | 138             | 900             | 2                 | 1  | 1  | 1               | 2               |
| 2014 | Buick    | Encore           | 900                                    | 75  | 270 | 250             | 900             | 2                 | 1  | 1  | 1               | 2               |
| 2015 | Chevy    | Tahoe            | 84                                     | 264 | 837 | 247             | 84              | 1                 | 3  | 3  | 3               | 1               |
| 2015 | Ford     | F150             | 569                                    | 869 | 900 | 791             | 569             | 1                 | 3  | 3  | 3               | 1               |
| 2016 | Kia      | Sedona           | 193                                    | 900 | 900 | 18              | 193             | 1                 | 3  | 3  | 1               | 1               |

<sup>a</sup> The cold start duration was quantified based on scenarios described in the main paper.

**Table S4.** Idle Cold Start Measurement – Summary of Time to Accumulate 90% of Cold Start Increment for Each Vehicle and Each of Fuel Use and Pollutants.

| Year | Make     | Model            | Time to Accumulate 90% of Cold Start Increment (s) |     |     |                 |                 |
|------|----------|------------------|----------------------------------------------------|-----|-----|-----------------|-----------------|
|      |          |                  | Fuel                                               | CO  | HC  | NO <sub>x</sub> | CO <sub>2</sub> |
| 2000 | Pontiac  | Grand Prix       | 487                                                | 151 | 377 | 770             | 487             |
| 2001 | Mazda    | Protégé          | 480                                                | 327 | 332 | 101             | 480             |
| 2004 | Pontiac  | Grand Am GT      | 331                                                | 50  | 107 | 654             | 331             |
| 2005 | Mazda    | 6                | 313                                                | 76  | 547 | 58              | 313             |
| 2008 | Honda    | Fit              | 49                                                 | 19  | 51  | 60              | 49              |
| 2008 | Chevy    | Impala           | 196                                                | 8   | 763 | 68              | 196             |
| 2011 | Chevy    | HHR              | 701                                                | 102 | 185 | 113             | 701             |
| 2011 | Toyota   | Camry            | 518                                                | 253 | 303 | 25              | 518             |
| 2012 | Nissan   | Versa            | 227                                                | 69  | 193 | 187             | 227             |
| 2012 | Fiat     | 500              | 255                                                | 13  | 101 | 89              | 255             |
| 2012 | Toyota   | Camry            | 568                                                | 194 | 277 | 48              | 568             |
| 2012 | Nissan   | Rogue            | 355                                                | 704 | 112 | 56              | 355             |
| 2012 | Ford     | Fusion           | 220                                                | 20  | 759 | 13              | 220             |
| 2012 | Dodge    | Avenger          | 250                                                | 75  | 110 | 50              | 250             |
| 2013 | Chevy    | Impala           | 296                                                | 17  | 52  | 15              | 296             |
| 2013 | Ford     | Fusion           | 532                                                | 16  | 122 | 27              | 532             |
| 2014 | Ford     | Focus            | 263                                                | 806 | 821 | 58              | 263             |
| 2015 | Ford     | Fusion           | 30                                                 | 15  | 34  | 13              | 30              |
| 2002 | Chevy    | Silverado        | 602                                                | 185 | 420 | 207             | 602             |
| 2002 | Lexus    | RX300            | 603                                                | 90  | 199 | 92              | 603             |
| 2002 | Jeep     | Wrangler (1)     | 205                                                | 6   | 609 | 119             | 205             |
| 2002 | Jeep     | Wrangler (2)     | 665                                                | 47  | 68  | 679             | 665             |
| 2004 | Toyota   | Tacoma           | 334                                                | 25  | 27  | 50              | 334             |
| 2004 | Chevy    | Trailblazer      | 700                                                | 205 | 596 | 244             | 700             |
| 2006 | Dodge    | Caravan          | 643                                                | 90  | 95  | 50              | 643             |
| 2008 | Nissan   | Xterra           | 265                                                | 25  | 649 | 67              | 265             |
| 2010 | Chevy    | Silverado        | 448                                                | 179 | 506 | 24              | 448             |
| 2011 | Ford     | XL150 (1)        | 503                                                | 114 | 798 | 15              | 503             |
| 2011 | Ford     | XL150 (2)        | 663                                                | 596 | 800 | 13              | 663             |
| 2012 | Toyota   | Sienna           | 384                                                | 59  | 123 | 10              | 384             |
| 2013 | GMC      | Yukon            | 123                                                | 13  | 483 | 44              | 123             |
| 2013 | GMC      | Terrain          | 638                                                | 18  | 298 | 22              | 638             |
| 2014 | Chrysler | Town and Country | 808                                                | 22  | 27  | 29              | 808             |
| 2014 | Buick    | Encore           | 748                                                | 23  | 94  | 132             | 748             |
| 2015 | Chevy    | Tahoe            | 45                                                 | 242 | 344 | 8               | 45              |
| 2015 | Ford     | F150             | 367                                                | 24  | 631 | 20              | 367             |
| 2016 | Kia      | Sedona           | 113                                                | 506 | 49  | 14              | 113             |

<sup>a</sup> The approach to steady-state time is approximate time when the fuel use or emission rates approach steady-state, regardless of comparison to hot-stabilized idling rates.

**Table S5.** Circuit Driving Cold Start Emissions and Hot-Stabilized Circuit Average Emissions and Driving Cold Start Increments for the Four Vehicles on Driving Cold Start Measurements.

| Vehicle          | Circuit                                    | Number of Circuits | Fuel Use (g) | CO (g) | HC (g) | NO <sub>x</sub> (g) | CO <sub>2</sub> (kg) |
|------------------|--------------------------------------------|--------------------|--------------|--------|--------|---------------------|----------------------|
| 2014 Ford Focus  | Cold Start Circuit Trip Total              | 1                  | 511          | 18     | 0.77   | 1.14                | 1.6                  |
|                  | Hot-Stabilized Circuits Average Trip Total | 3                  | 435          | 11     | 0.039  | 0.35                | 1.4                  |
|                  | Cold Start Increment                       |                    | 77           | 7.0    | 0.73   | 0.79                | 0.2                  |
| 2015 Ford Fusion | Cold Start Circuit Trip Total              | 1                  | 622          | 12     | 0.043  | 0.21                | 2.0                  |
|                  | Hot-Stabilized Circuits Average Trip Total | 1                  | 514          | 1.7    | 0.022  | 0.11                | 1.6                  |
|                  | Cold Start Increment                       |                    | 108          | 10     | 0.021  | 0.10                | 0.4                  |
| 2015 Chevy Tahoe | Cold Start Circuit Trip Total              | 1                  | 815          | 15     | 0.71   | 0.29                | 2.6                  |
|                  | Hot-Stabilized Circuits Average Trip Total | 7                  | 717          | 0.71   | 0.083  | 0.13                | 2.3                  |
|                  | Cold Start Increment                       |                    | 98           | 14     | 0.63   | 0.16                | 0.                   |
| 2015 Ford F150   | Cold Start Circuit Trip Total              | 1                  | 825          | 14     | 0.65   | 0.78                | 2.6                  |
|                  | Hot-Stabilized Circuits Average Trip Total | 1                  | 784          | 1.2    | 0.027  | 0.084               | 2.5                  |
|                  | Cold Start Increment                       |                    | 41           | 13     | 0.62   | 0.70                | 0.1                  |
| 2016 Kia Sedona  | Cold Start Circuit Trip Total              | 1                  | 728          | 2.7    | 0.17   | 0.51                | 2.3                  |
|                  | Hot-Stabilized Circuits Average Trip Total | 3                  | 682          | 0.6    | 0.008  | 0.04                | 2.2                  |
|                  | Cold Start Increment                       |                    | 46           | 2.1    | 0.16   | 0.47                | 0.1                  |
| Average          | Cold Start Circuit Trip Total              |                    | 700          | 12.3   | 0.47   | 0.59                | 2.2                  |
|                  | Hot-Stabilized Circuits Average Trip Total |                    | 644          | 2.8    | 0.051  | 0.15                | 2.0                  |
|                  | Cold Start Increment                       |                    | 56           | 9.5    | 0.42   | 0.44                | 0.2                  |

**Table S6.** Emissions for Different Cold Start Scenarios for the 2014 Ford Focus.

| Scenario                    | Summarizing Amount                     | Fuel Use (g) | CO (g) | HC (g) | NO <sub>x</sub> (g) | CO <sub>2</sub> (kg) |
|-----------------------------|----------------------------------------|--------------|--------|--------|---------------------|----------------------|
| Idling Cold Start           | 15 min idling total                    | 264          | 3.3    | 0.41   | 0.072               | 0.83                 |
| Five-and-Drive <sup>a</sup> | 5 min idling total + driving increment | 137          | 3.9    | 0.22   | 0.19                | 0.43                 |
| Driving Cold Start          | Driving increment                      | 77           | 7.0    | 0.73   | 0.79                | 0.20                 |

<sup>a</sup> The five-and-drive measurement includes five minutes of idle following by driving after an engine cold start.

**Table S7.** Idle Cold Start Increment, Hot-Stabilized Trip Total Emissions, and Cold Start Contributions for Each Trip, based on Measured Idle Cold Start and Hot-Stabilized Operation.

| Cold Start or Route                                      | CO                        |                  | HC           |     | NO <sub>x</sub> |      | CO <sub>2</sub> |      |
|----------------------------------------------------------|---------------------------|------------------|--------------|-----|-----------------|------|-----------------|------|
|                                                          | Total <sup>a</sup><br>(g) | CSC <sup>b</sup> | Total<br>(g) | CSC | Total<br>(g)    | CSC  | Total<br>(kg)   | CSC  |
| <b>Cold Start Increment</b>                              | 4.4                       |                  | 0.26         |     | 0.060           |      | 0.18            |      |
| <b>A_out<br/>Trip Total</b>                              | 9.1                       | 33%              | 0.093        | 74% | 0.22            | 22%  | 4.7             | 4%   |
| <b>A_in<br/>Trip Total</b>                               | 20                        | 18%              | 0.35         | 43% | 0.60            | 9%   | 4.5             | 4%   |
| <b>C_out<br/>Trip Total</b>                              | 19                        | 19%              | 0.18         | 60% | 0.53            | 10%  | 4.5             | 4%   |
| <b>C_in<br/>Trip Total</b>                               | 30                        | 13%              | 0.21         | 56% | 0.98            | 6%   | 4.1             | 4%   |
| <b>1_out<br/>Trip Total</b>                              | 7.9                       | 36%              | 0.27         | 49% | 0.84            | 7%   | 5.1             | 3%   |
| <b>1_in<br/>Trip Total</b>                               | 9.6                       | 31%              | 0.17         | 60% | 1.0             | 6%   | 5.4             | 3%   |
| <b>3_out<br/>Trip Total</b>                              | 30                        | 13%              | 0.34         | 43% | 0.99            | 6%   | 6.5             | 3%   |
| <b>3_in<br/>Trip Total</b>                               | 32                        | 12%              | 0.44         | 37% | 1.0             | 6%   | 6.9             | 3%   |
| <b>Hot-Stabilized Average<br/>Trip Total<sup>c</sup></b> | 20                        | 18%              | 0.26         | 50% | 0.77            | 7.2% | 5.2             | 3.3% |
| <b>Hot-Stabilized 95% CI<sup>d</sup></b>                 | 8.5                       | 7.8%             | 0.096        | 19% | 0.24            | 2.3% | 0.84            | 0.5% |

<sup>a</sup> Total hot-stabilized trip emissions without cold start for each trip.

<sup>b</sup> CSC = Cold Start Contribution, which is the cold start increment divided by the sum of cold start increment and hot-stabilized trip total.

<sup>c</sup> The average is the average value for 8 trips.

<sup>d</sup> 95% CI = 95% Confidence Interval

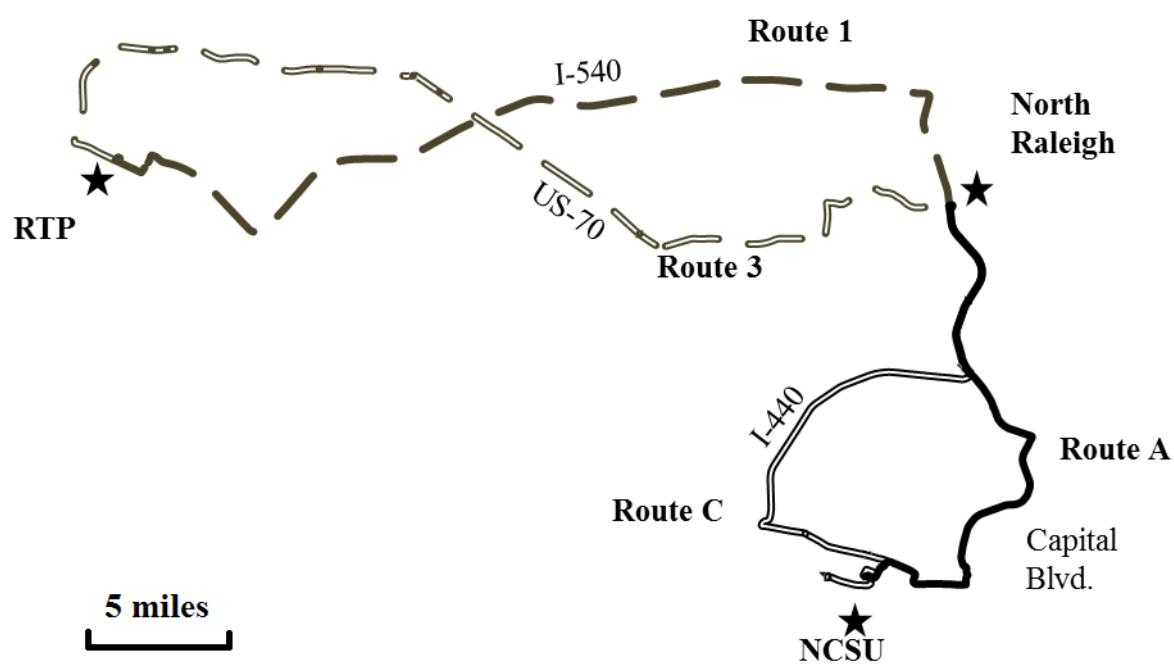

**Figure S1.** Maps For the Four Routes in Raleigh and Research Triangle Park Area in NC Used for Hot-Stabilized Operation Measurements.

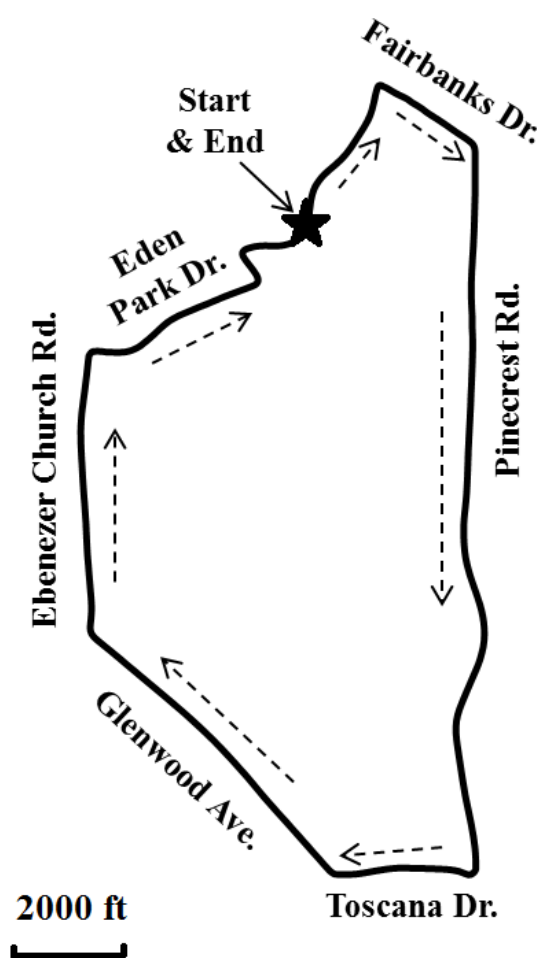

Figure S2. Map for Driving Cold Start Measurement in Raleigh, NC Area.

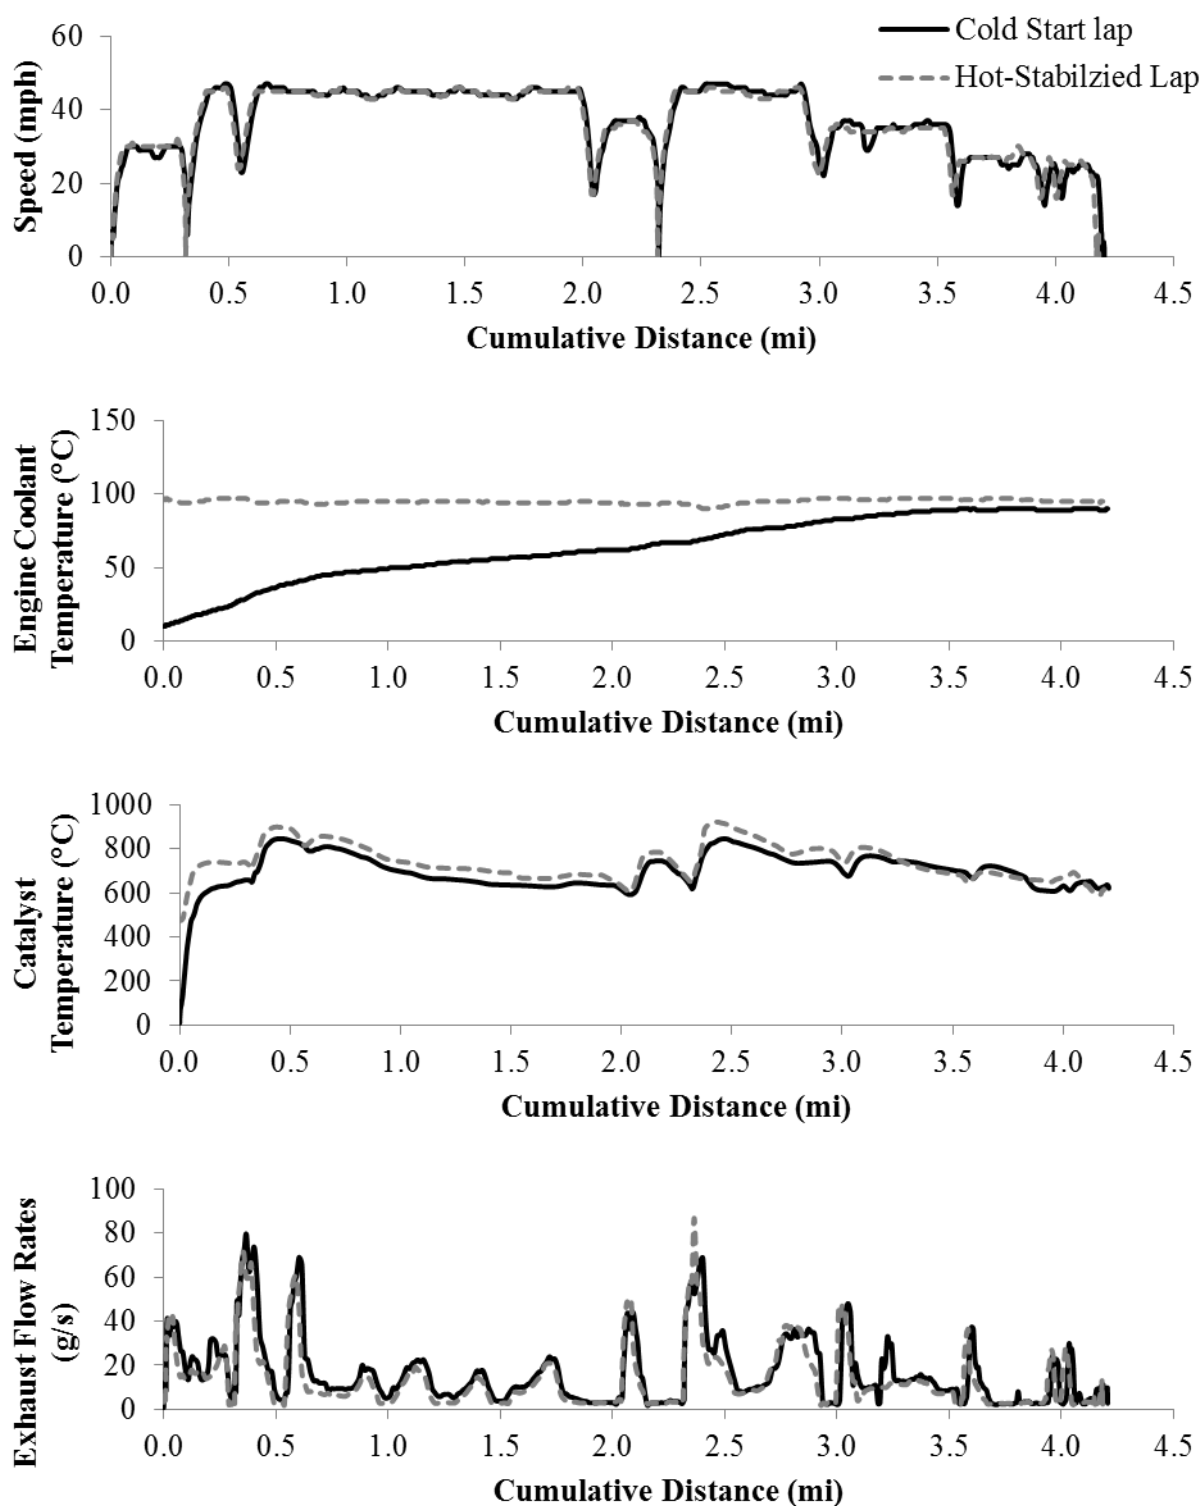

**Figure S3.** Speed, Engine Coolant Temperature, Catalyst Temperature, and Exhaust Flow Rate versus Cumulative Distance during Driving Cold Start Measurement for the 2014 Ford Focus.

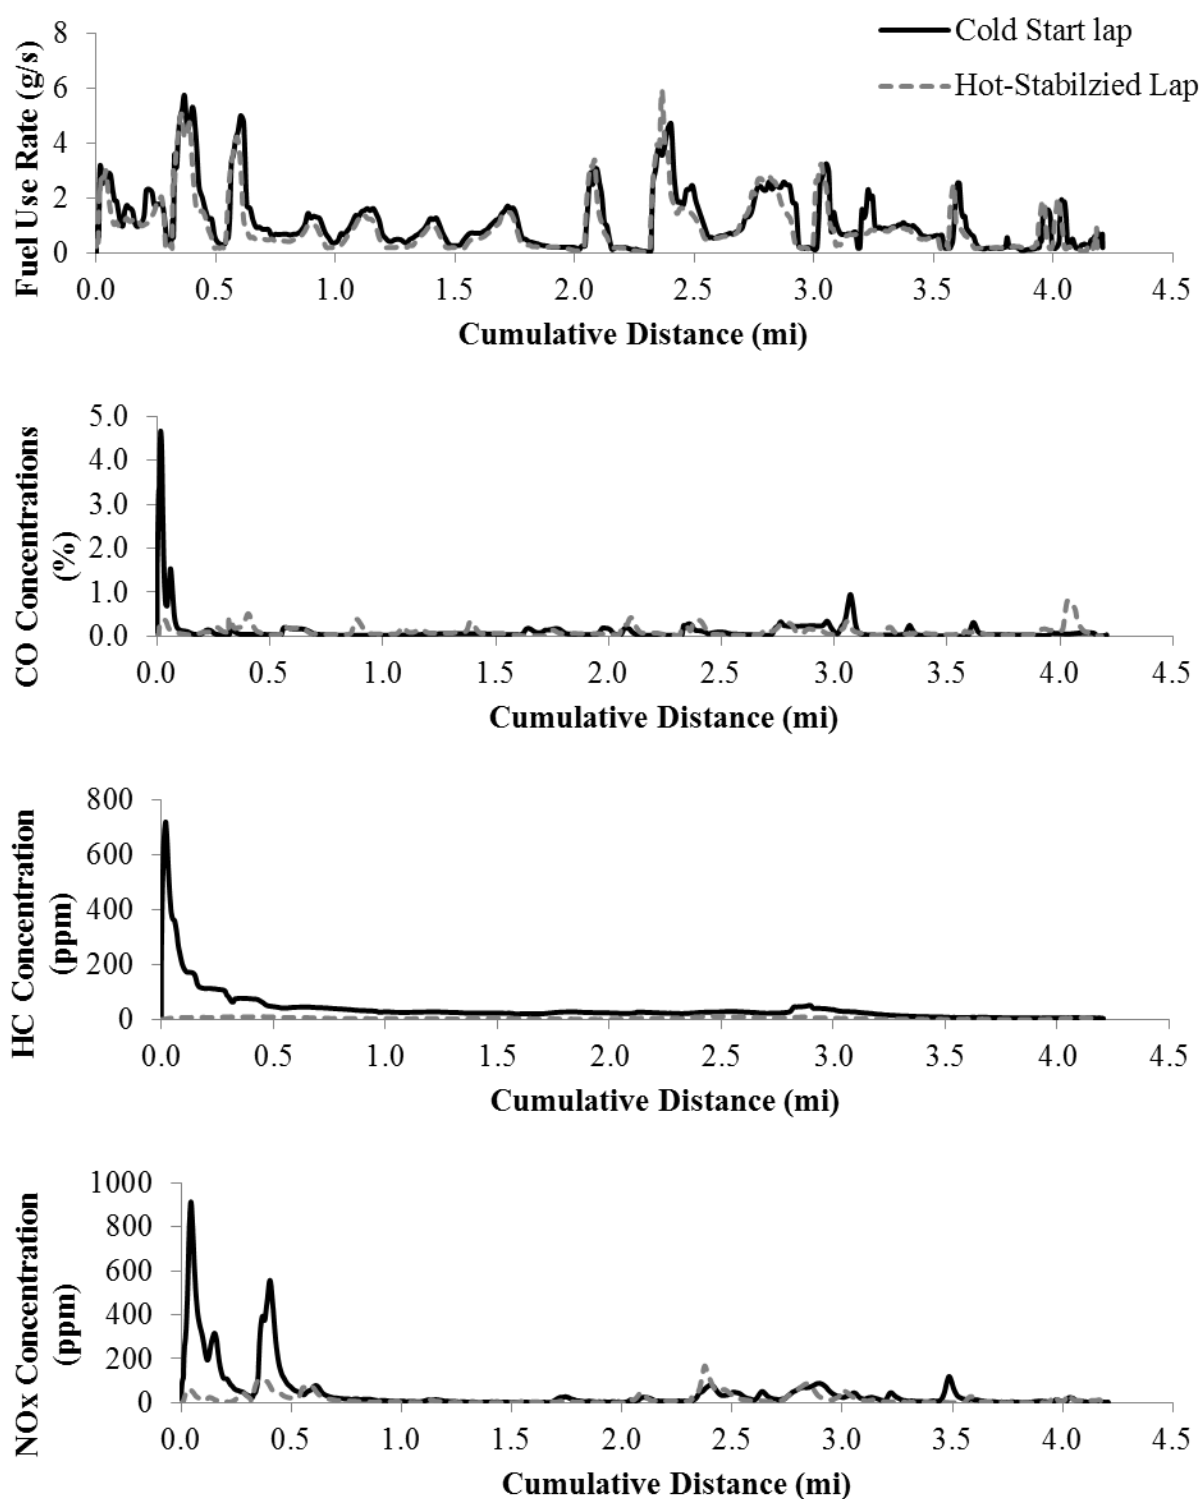

**Figure S4.** Fuel Use Rates and Emission Concentrations versus Cumulative Distance during Driving Cold Start Measurement for the 2014 Ford Focus.

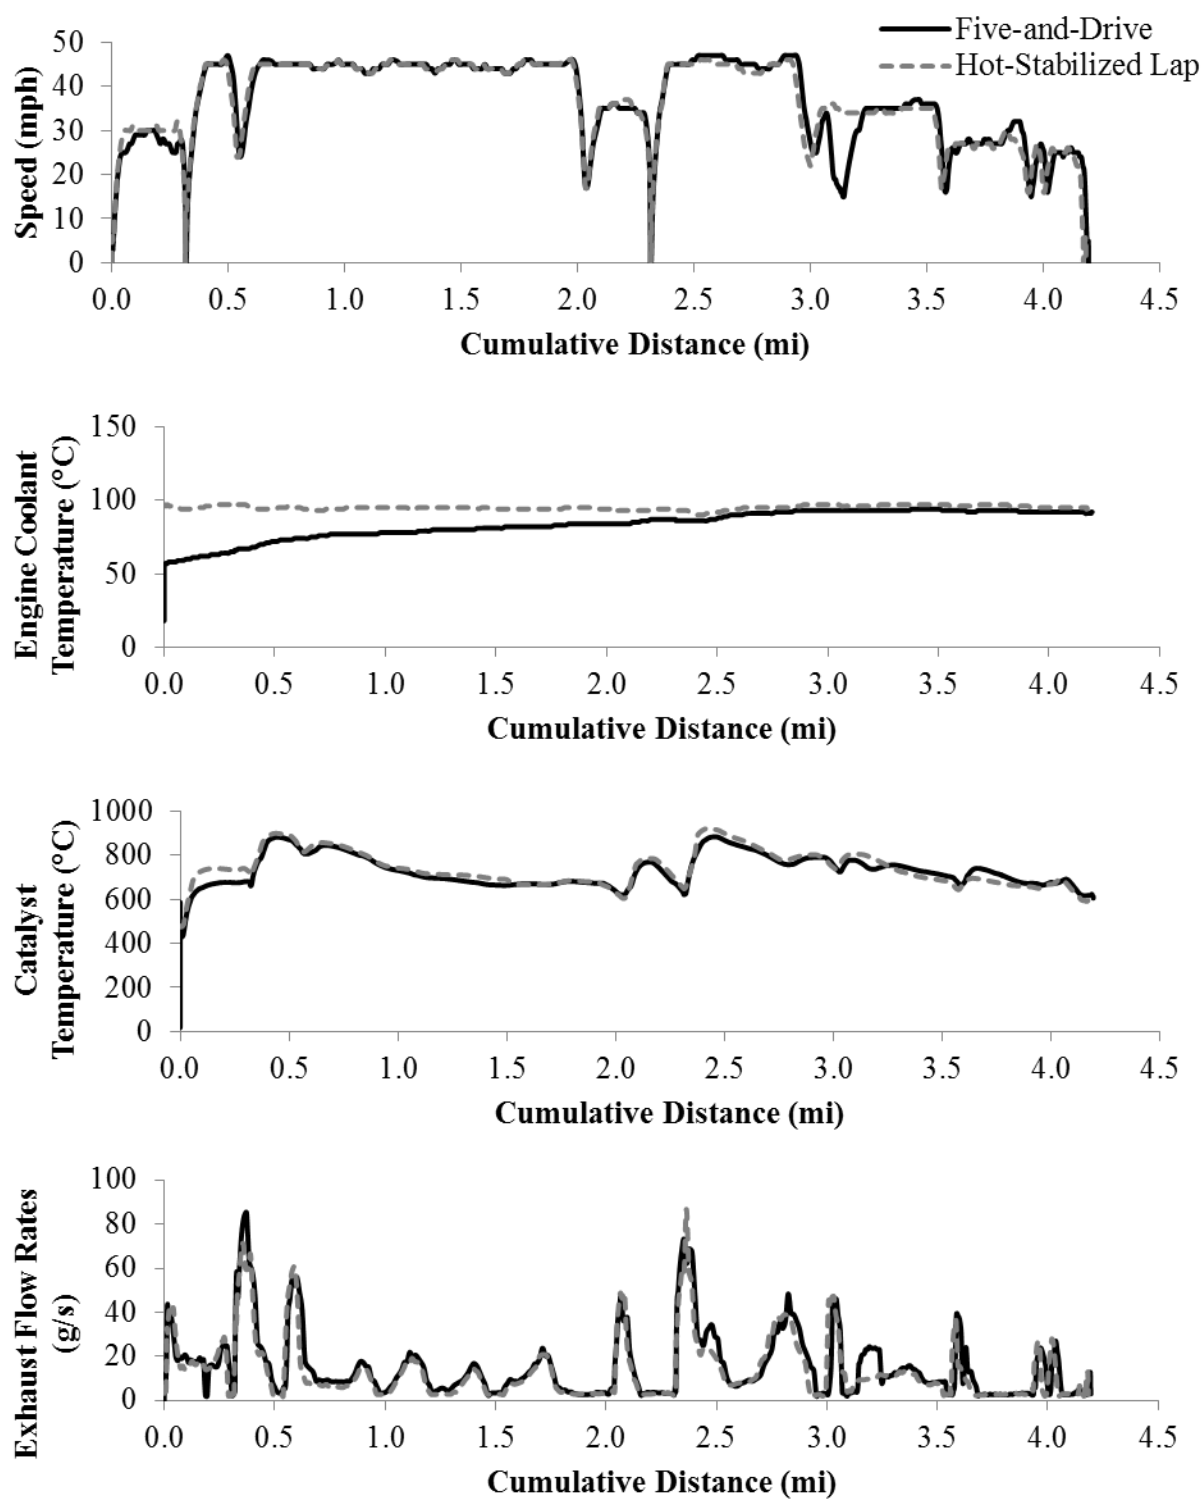

**Figure S5.** Speed, Engine Coolant Temperature, Catalyst Temperature, and Exhaust Flow Rate versus Cumulative Distance during Five-and-Drive Cold Start Measurement for the 2014 Ford Focus.

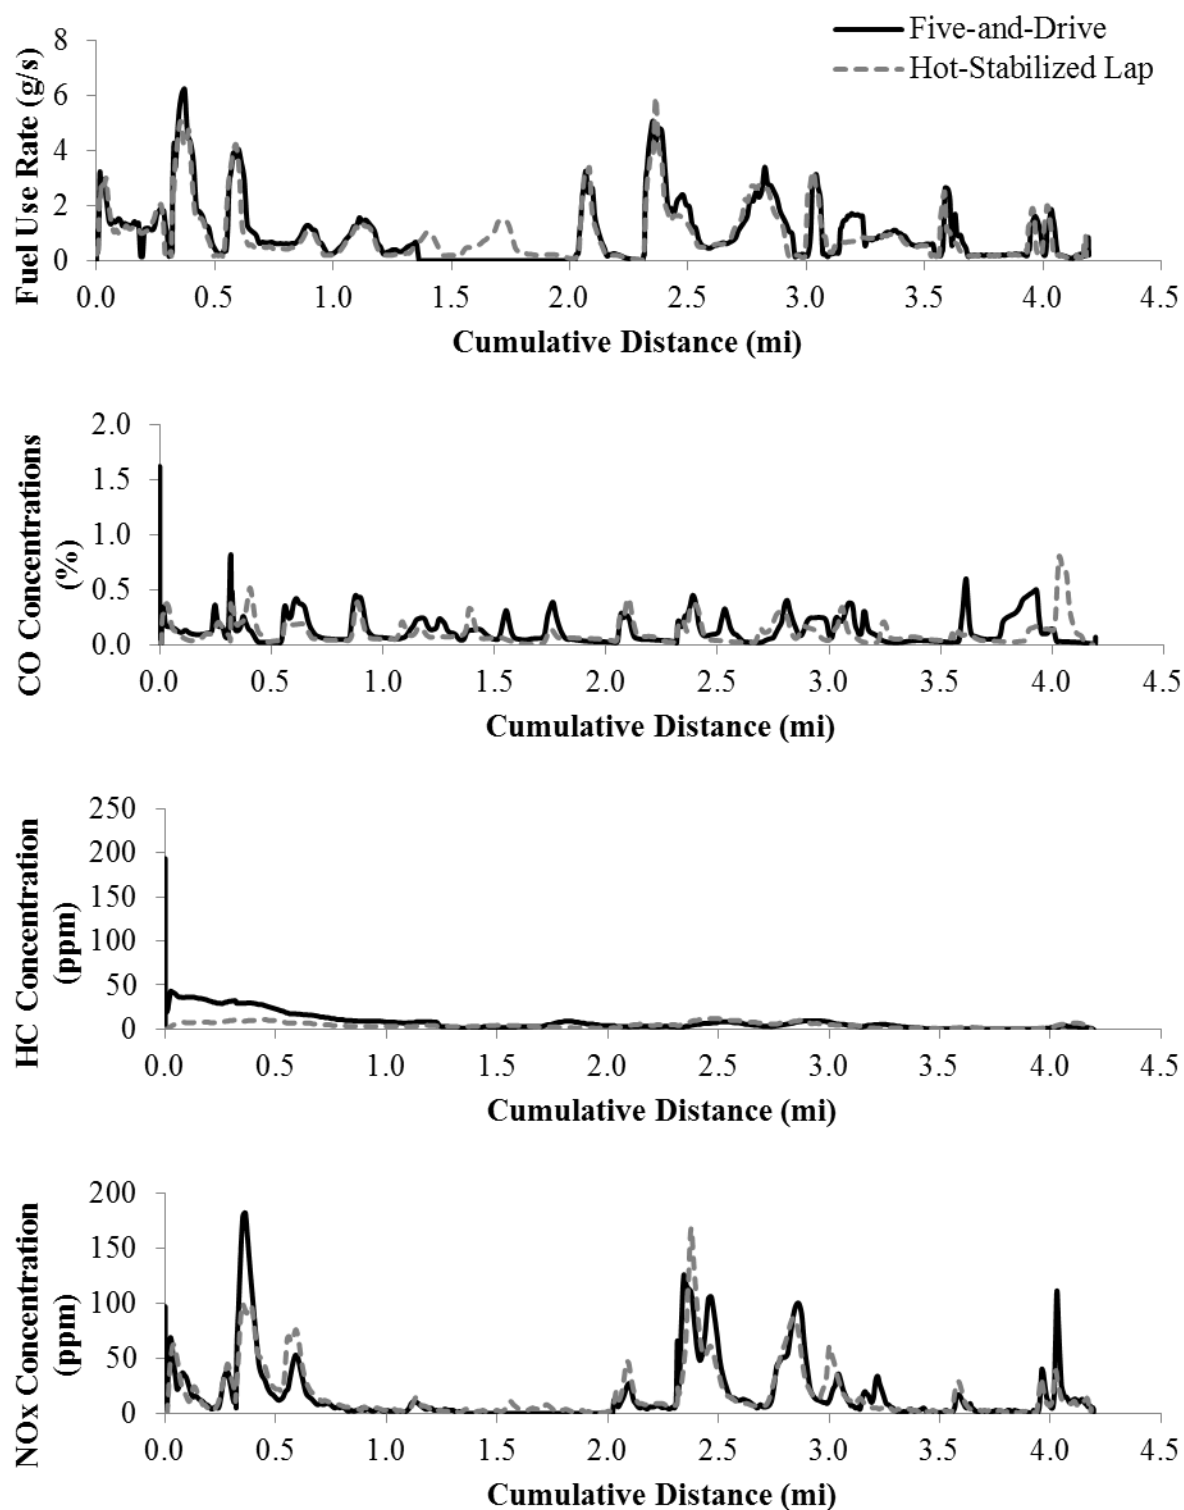

**Figure S6.** Fuel Use Rates and Emission Concentrations versus Cumulative Distance during Five-and-Drive Cold Start Measurement for the 2014 Ford Focus.

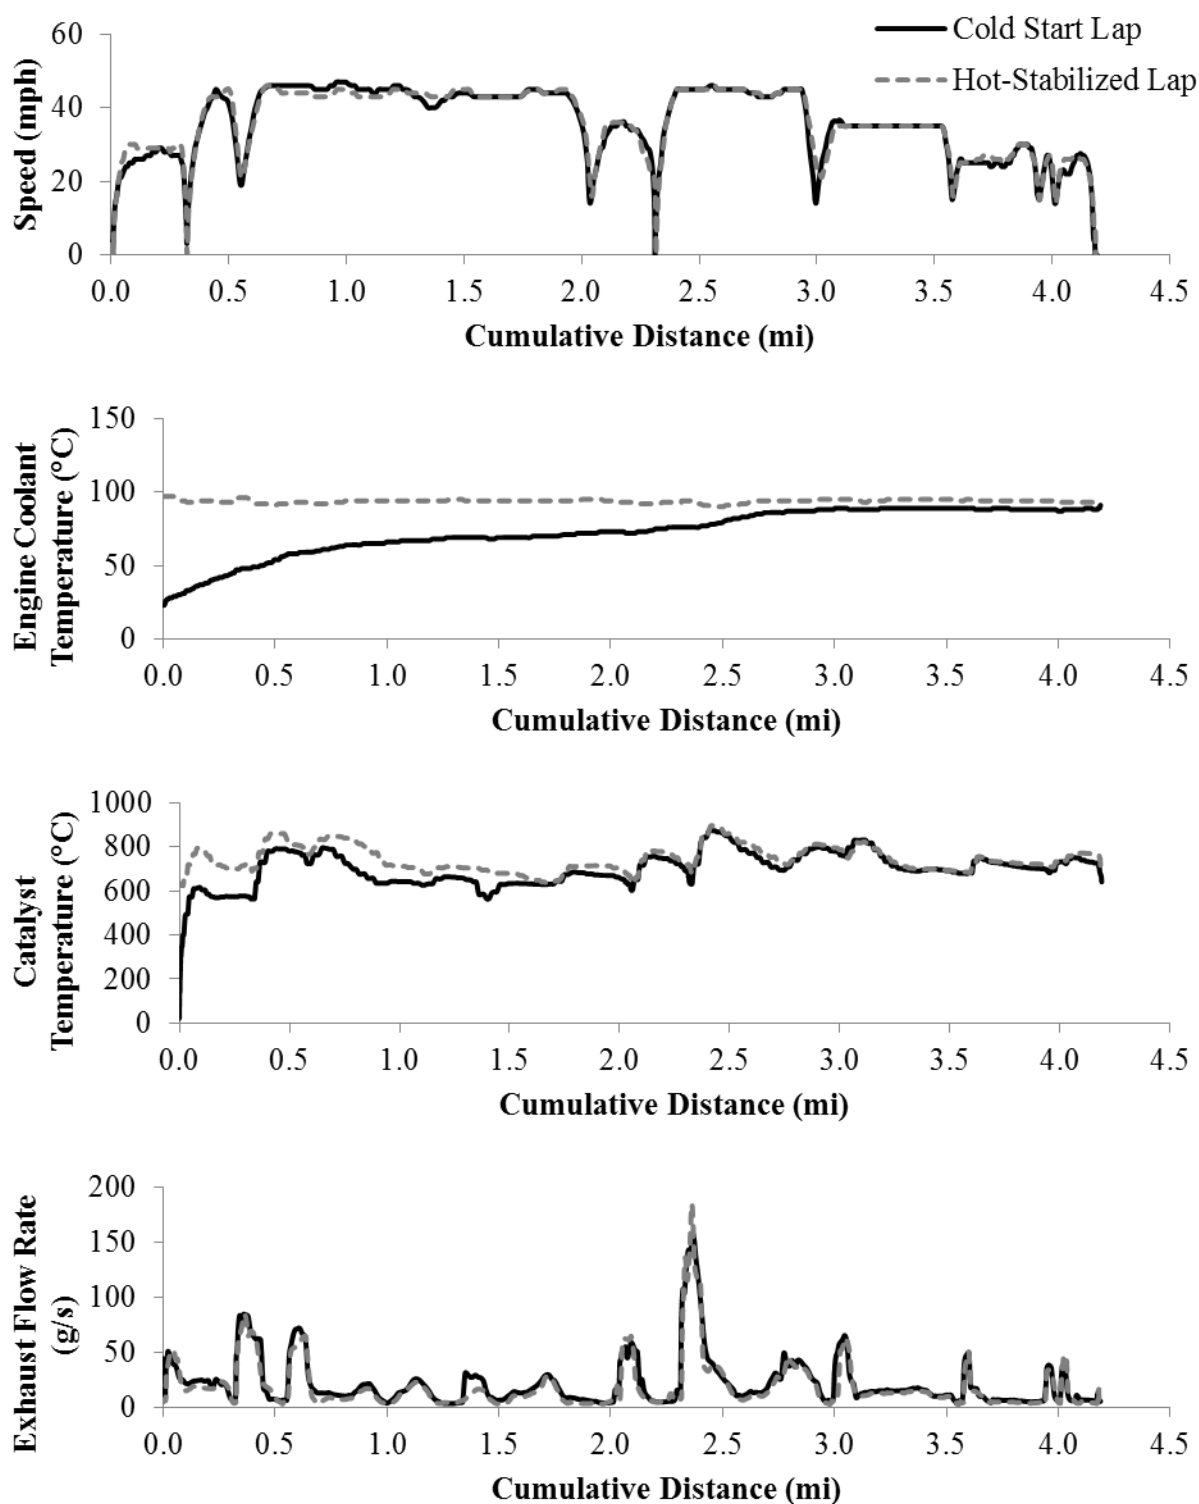

**Figure S7.** Speed, Engine Coolant Temperature, Catalyst Temperature, and Exhaust Flow Rate versus Cumulative Distance during Driving Cold Start Measurement for the 2015 Ford Fusion.

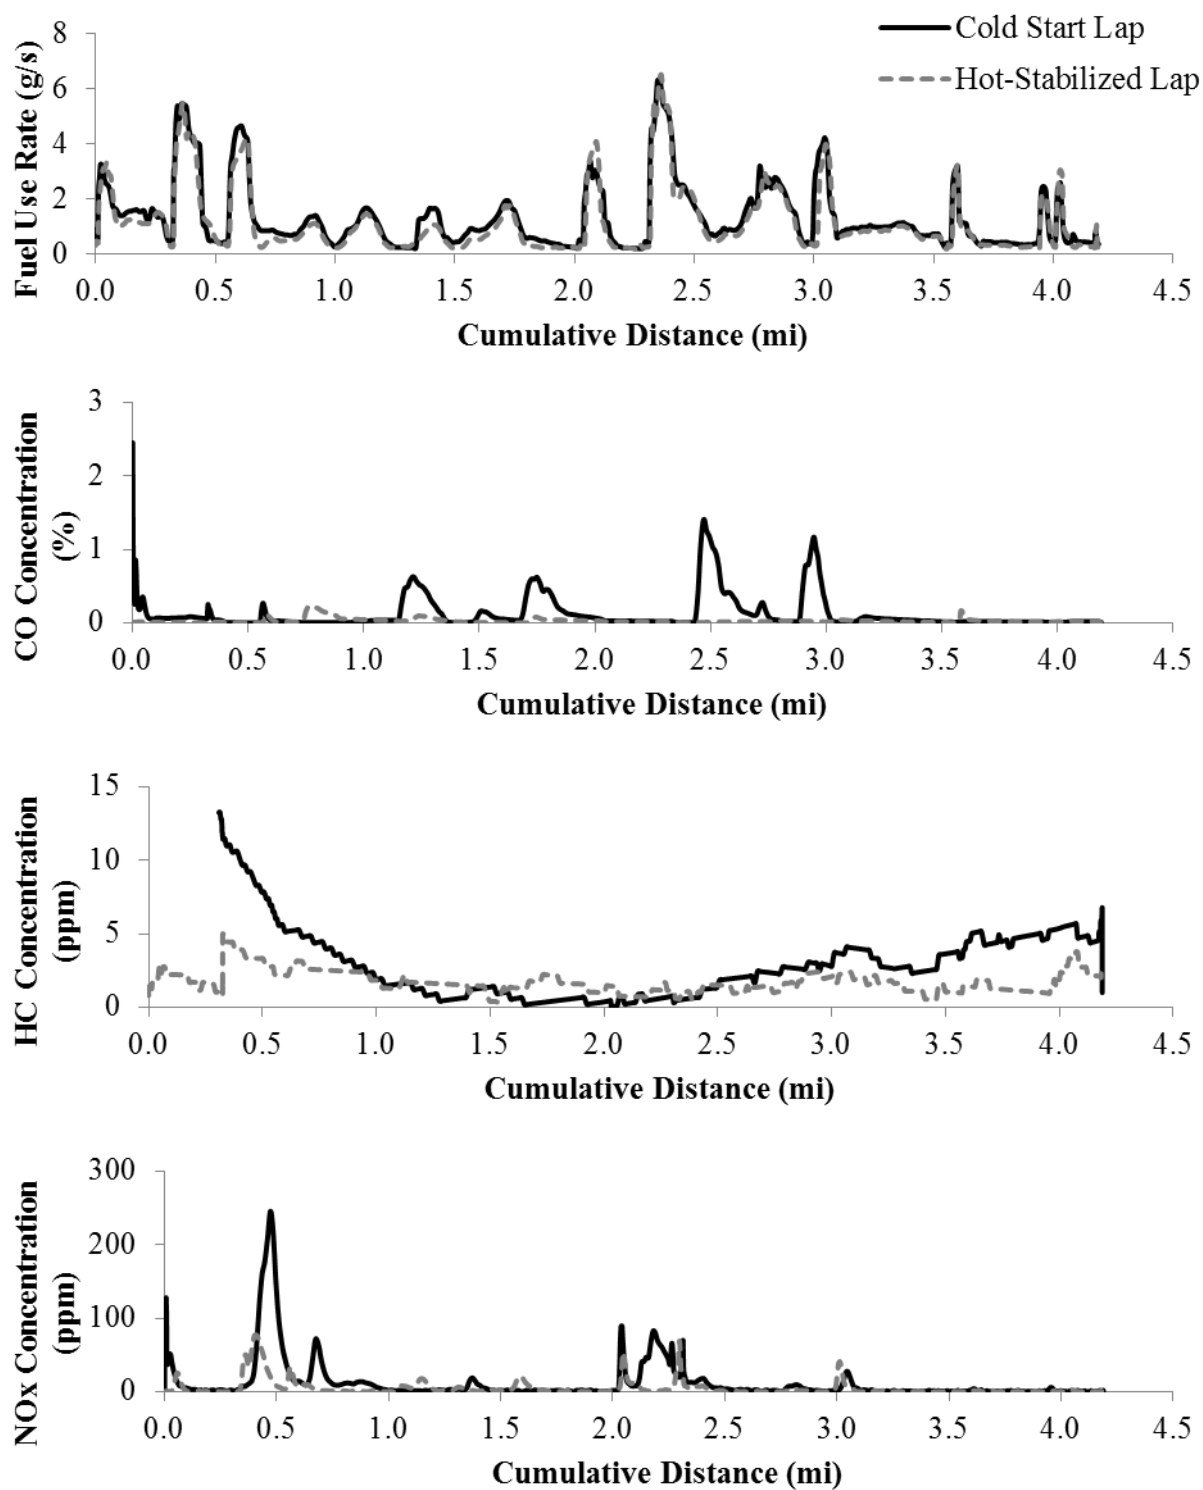

**Figure S8.** Fuel Use Rates and Emission Concentrations versus Cumulative Distance during Driving Cold Start Measurement for the 2015 Ford Fusion.

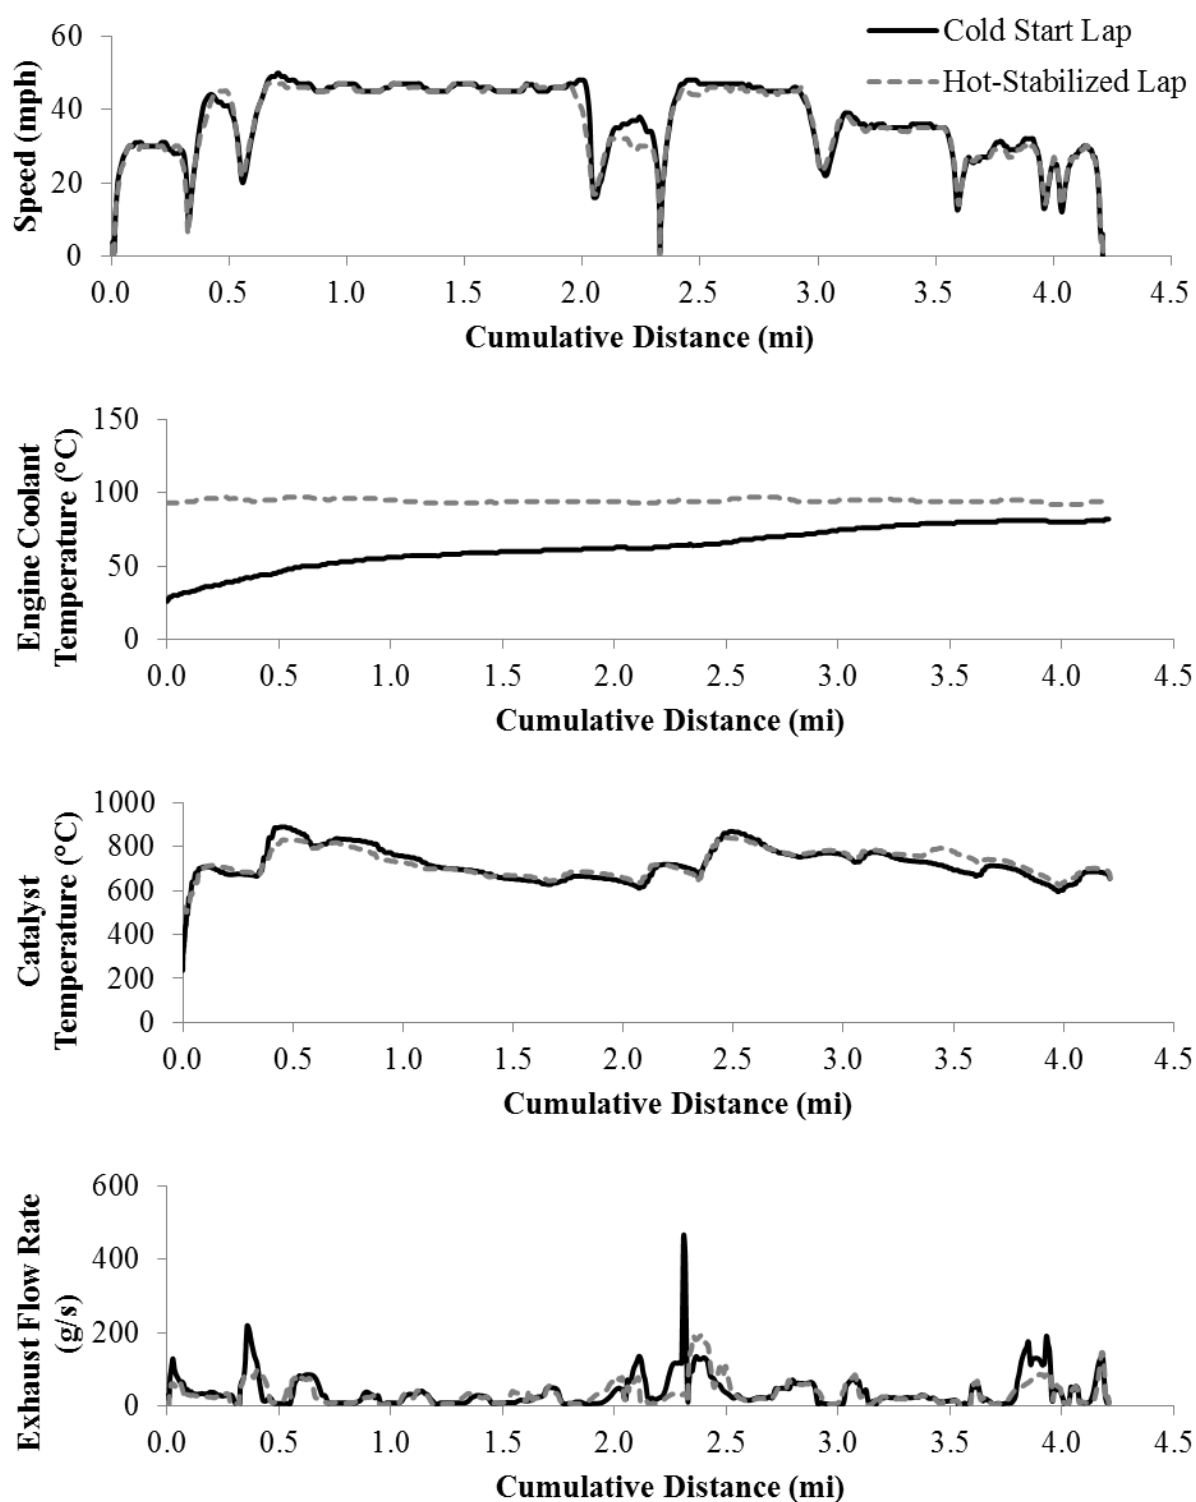

**Figure S9.** Speed, Engine Coolant Temperature, Catalyst Temperature, and Exhaust Flow Rate versus Cumulative Distance during Driving Cold Start Measurement for the 2015 Chevrolet Tahoe.

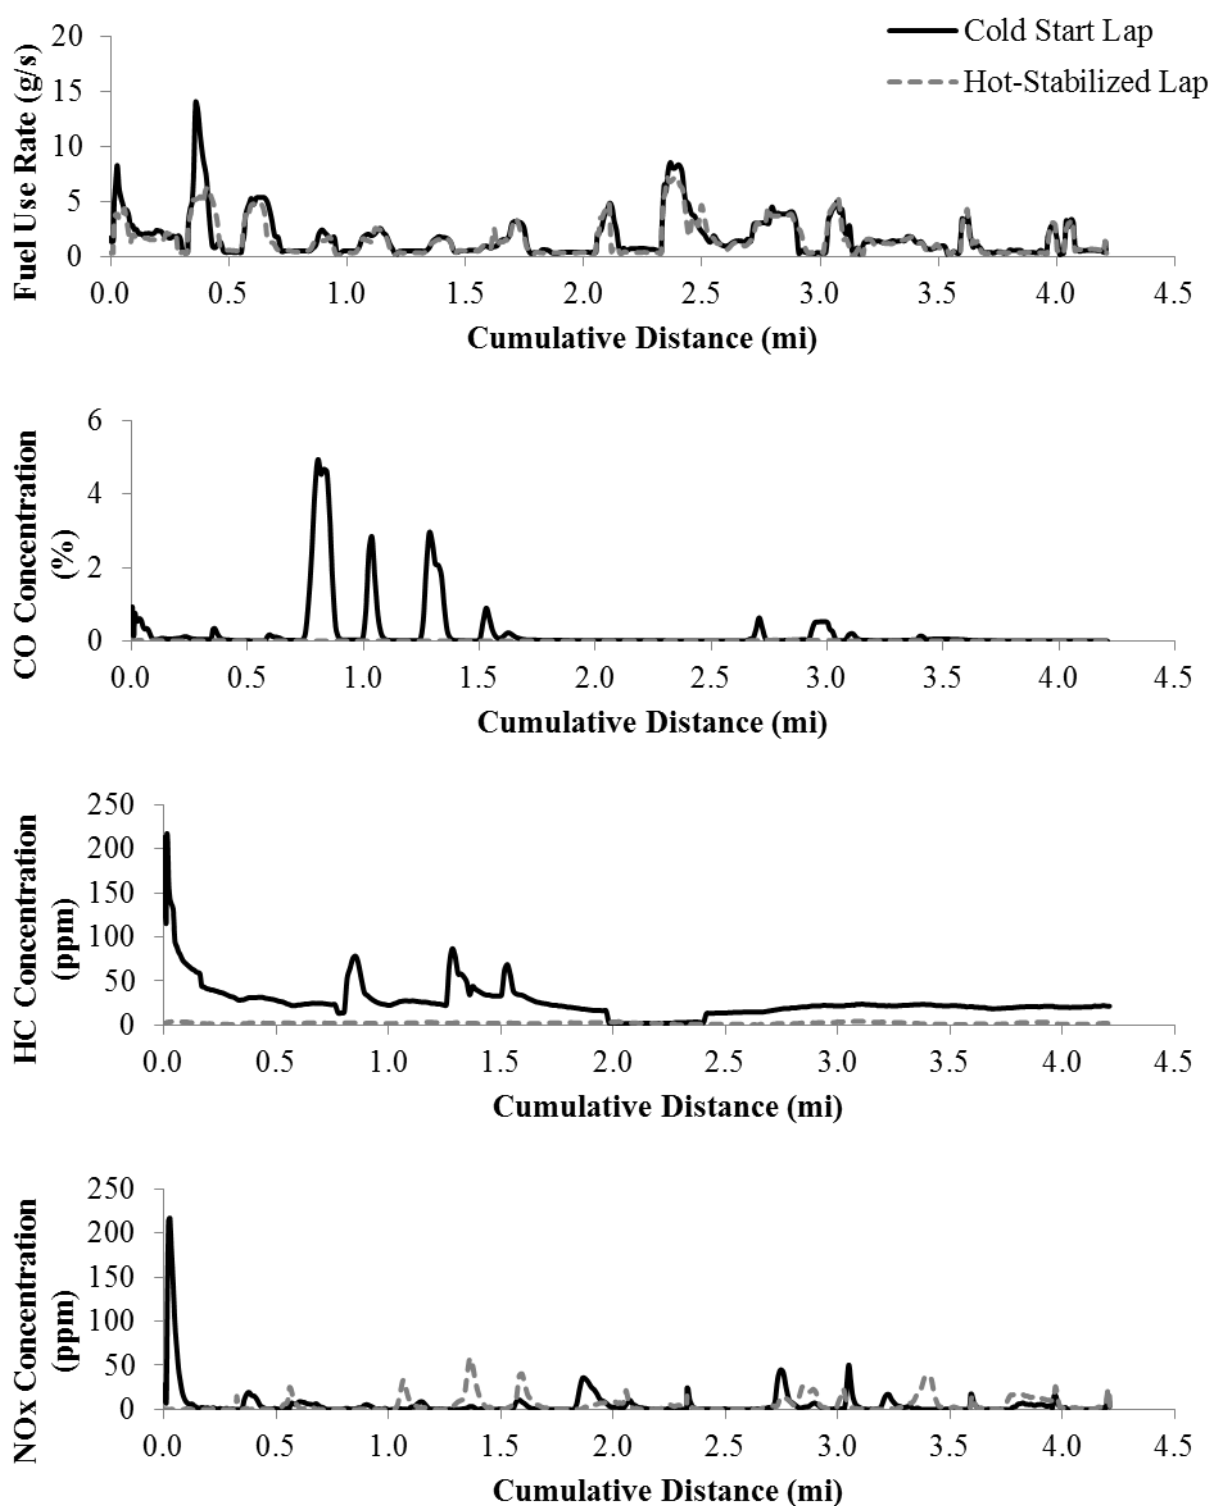

**Figure S10.** Fuel Use Rates and Emission Concentrations versus Cumulative Distance during Driving Cold Start Measurement for the 2015 Chevrolet Tahoe.

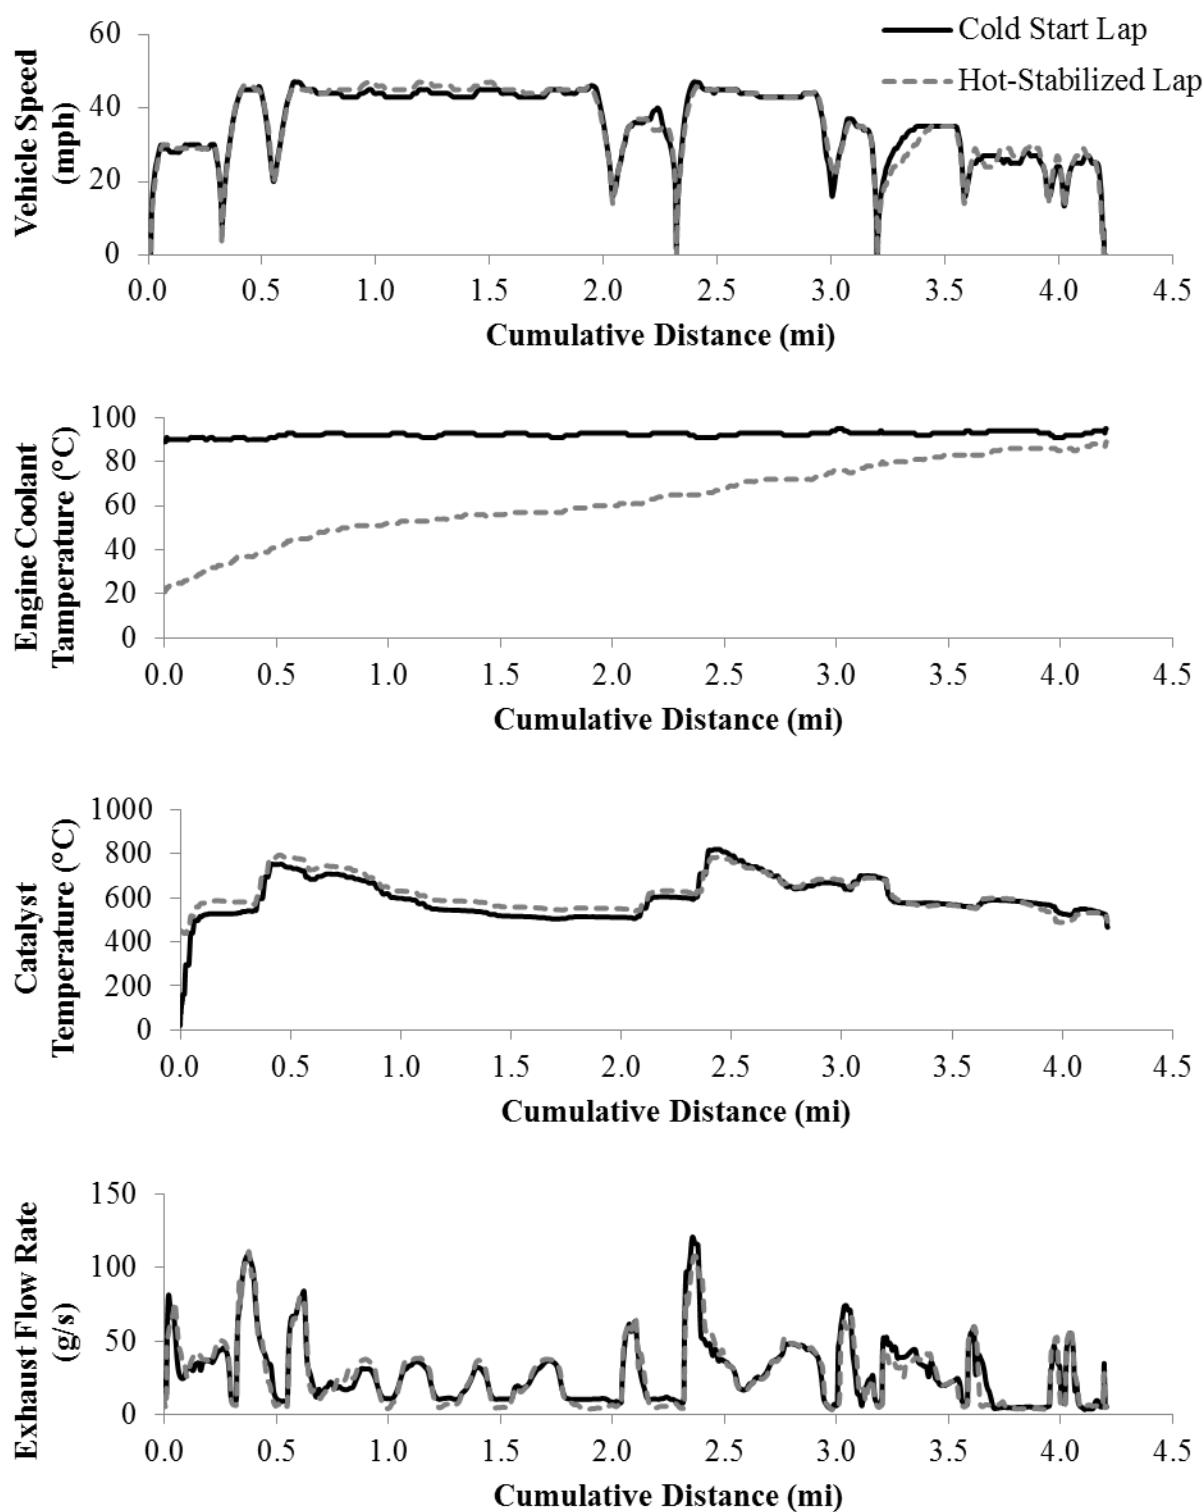

**Figure S11.** Speed, Engine Coolant Temperature, Catalyst Temperature, and Exhaust Flow Rate versus Cumulative Distance during Driving Cold Start Measurement for the 2015 Ford F150.

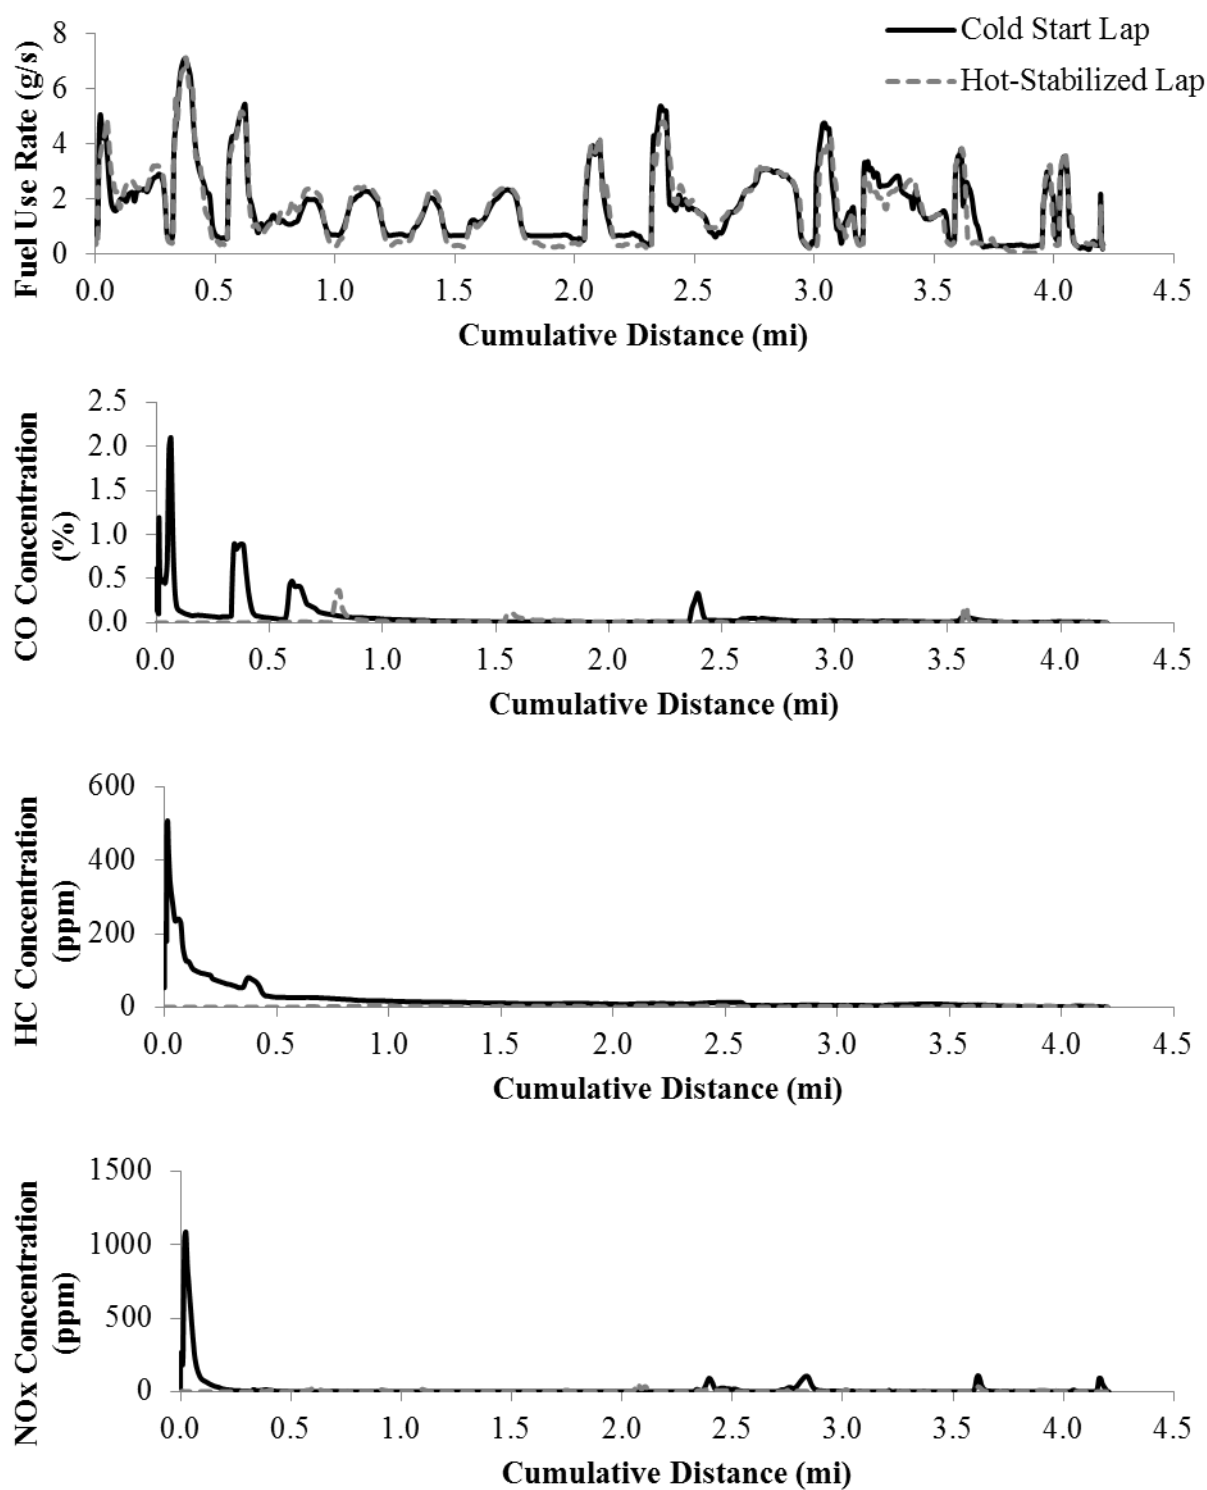

**Figure S12.** Fuel Use Rates and Emission Concentrations versus Cumulative Distance during Driving Cold Start Measurement for the 2015 Ford F150.

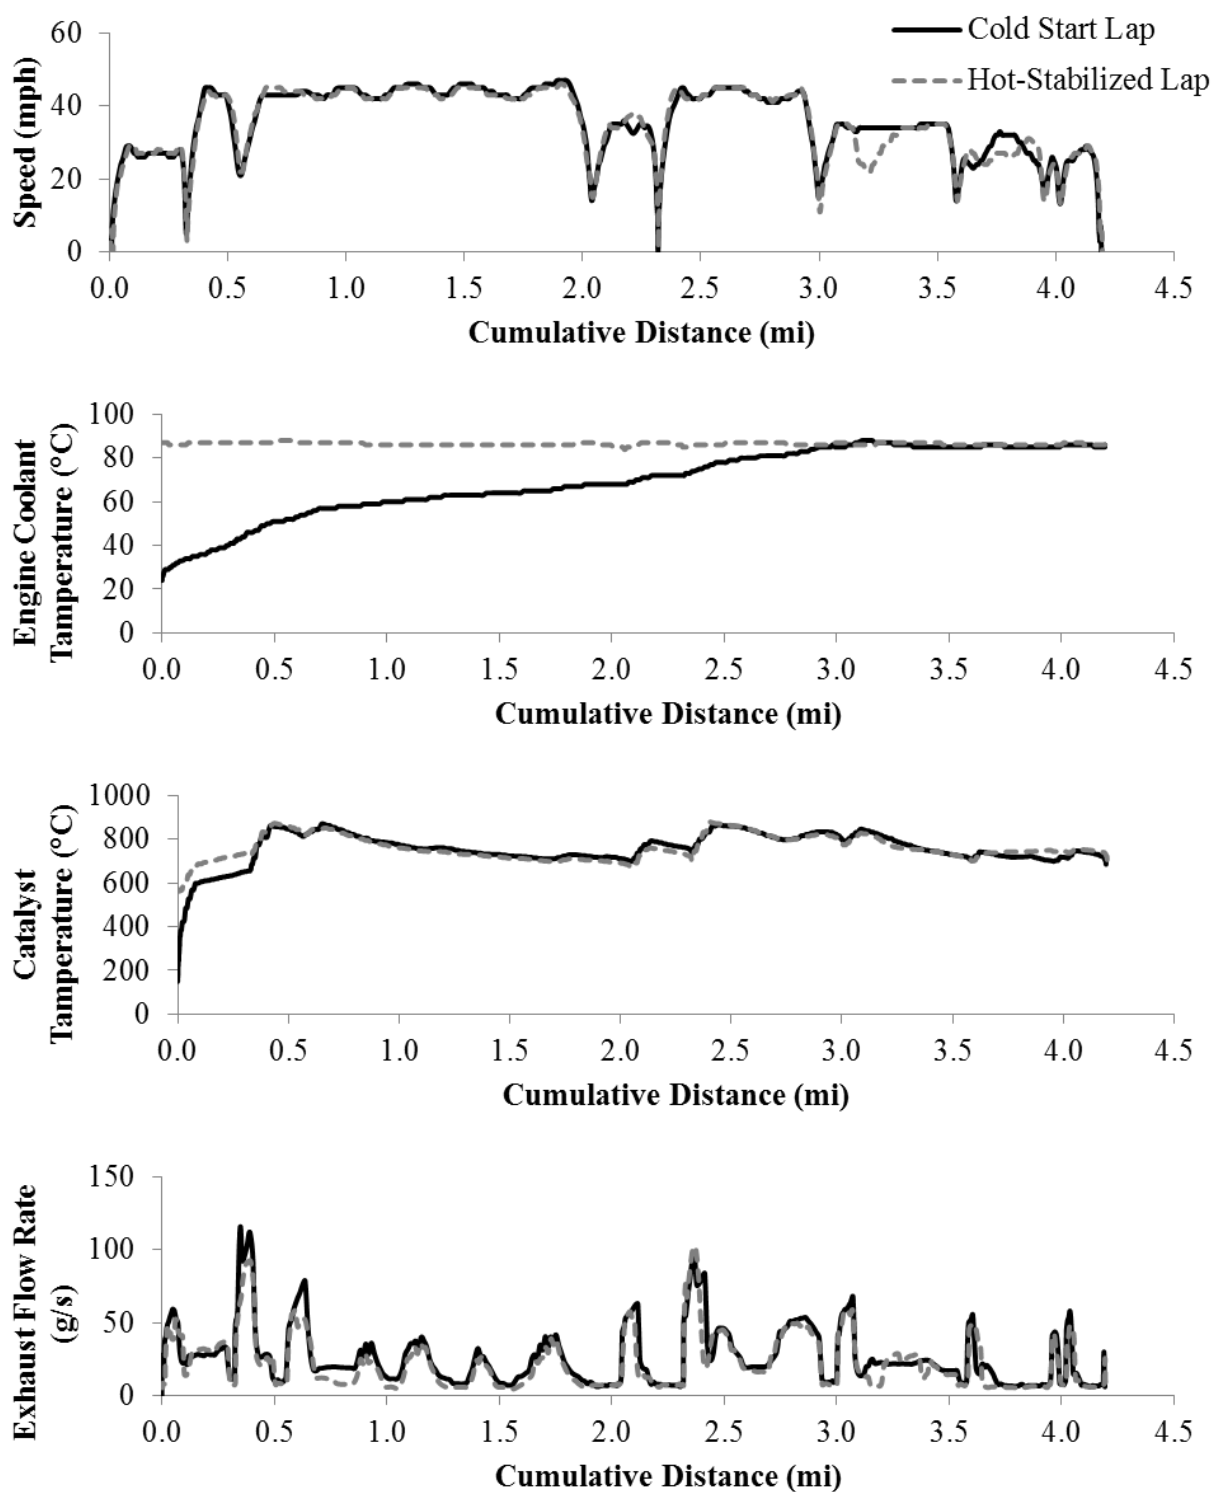

**Figure S13.** Speed, Engine Coolant Temperature, Catalyst Temperature, and Exhaust Flow Rate versus Cumulative Distance during Driving Cold Start Measurement for the 2016 Kia Sedona.

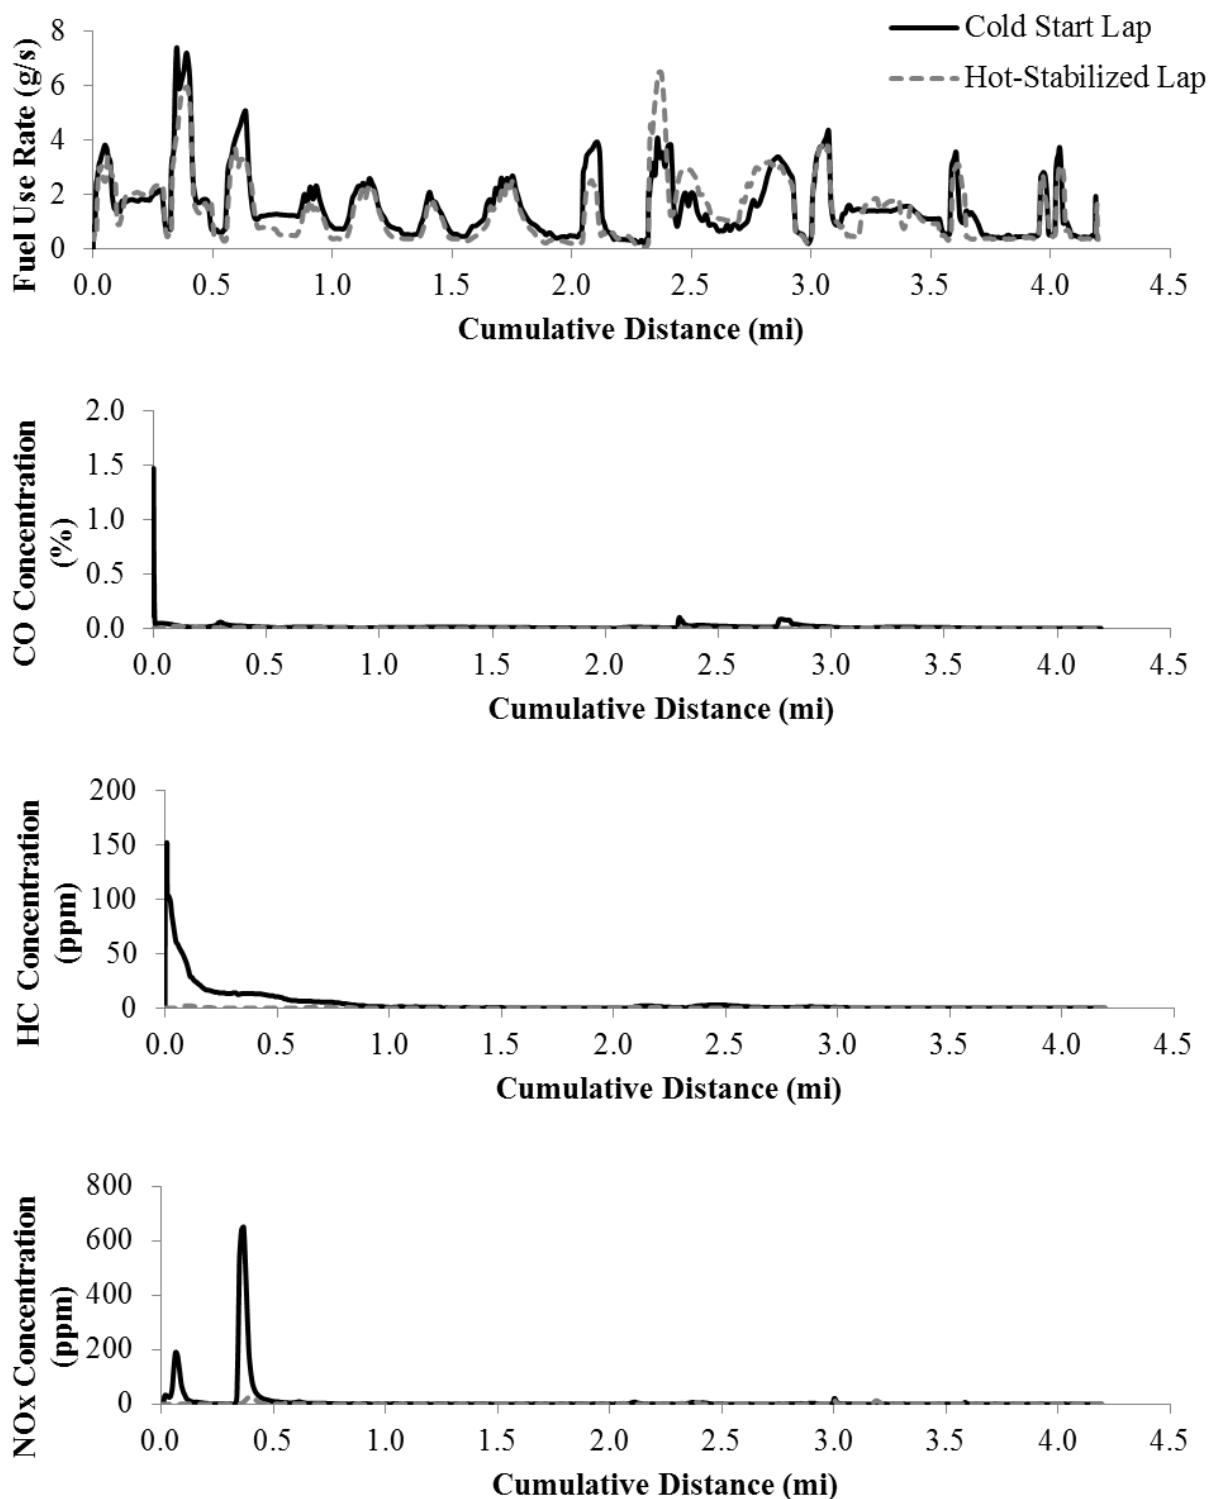

**Figure S14.** Fuel Use Rates and Emission Concentrations versus Cumulative Distance during Driving Cold Start Measurement for the 2016 Kia Sedona.

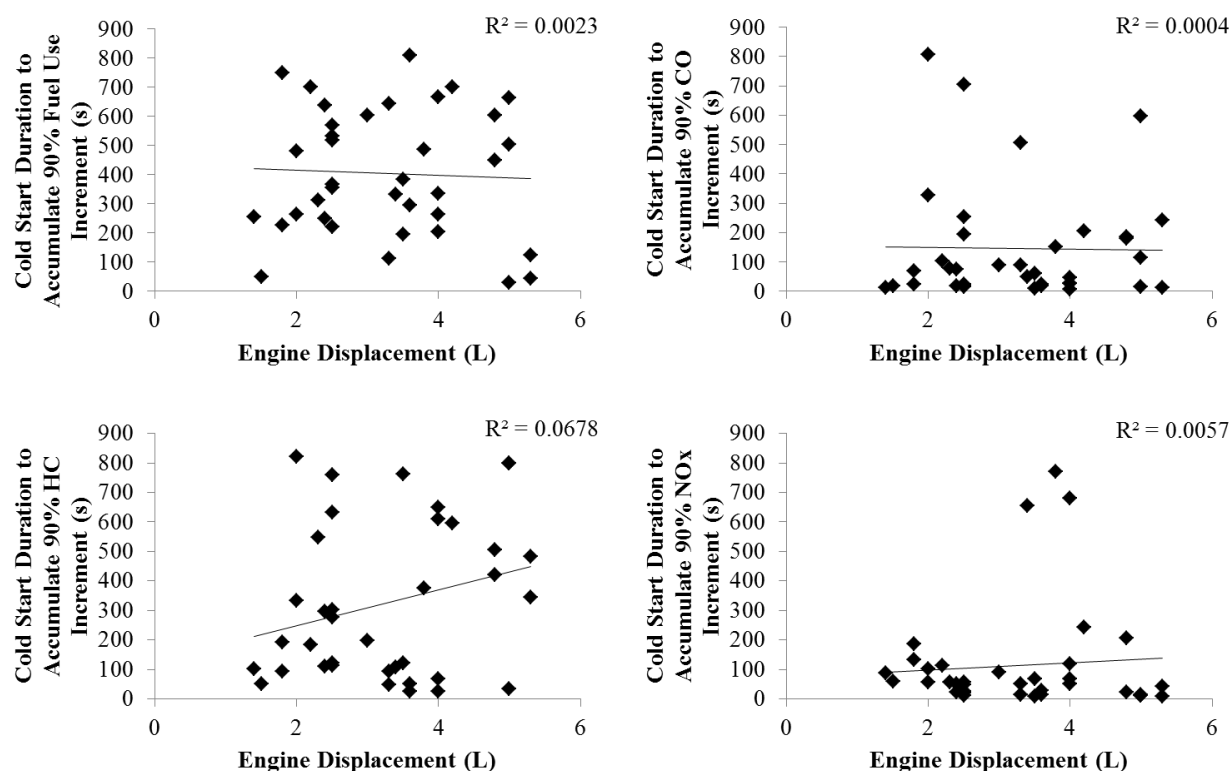

**Figure S15.** Scatter Plot of Cold Start Duration to Accumulate 90% Cold Start Increment versus Engine Displacement for All Measured Vehicles for Each of Fuel Use, Carbon Monoxide, Hydrocarbon, and Nitrogen Oxides. Each Panel Includes 37 Points with Each Point Represent One Vehicle.

No statistically significant linear relationships with engine displacement were observed for each of cold start approach to steady-state time for fuel use, CO, HC, and NO<sub>x</sub>.

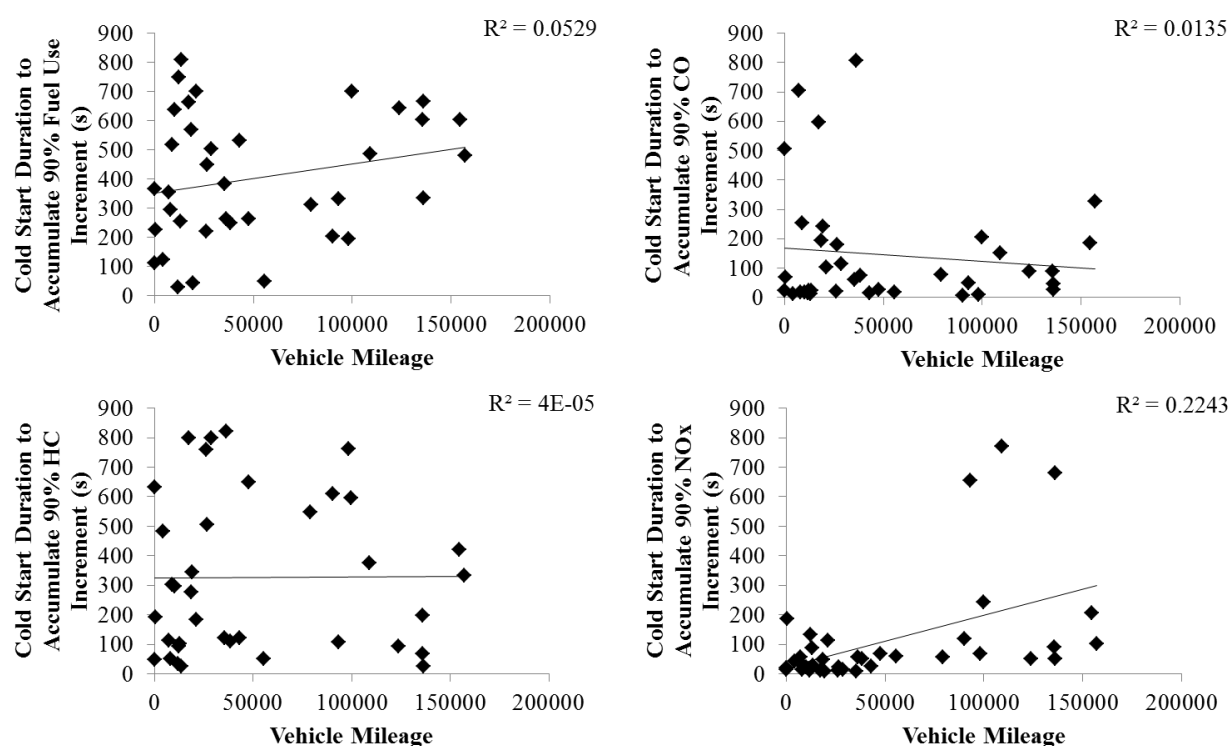

**Figure S16.** Scatter Plot of Cold Start Duration to Accumulate 90% Cold Start Increment versus Vehicle Mileage for All Measured Vehicles for Each of Fuel Use, Carbon Monoxide, Hydrocarbon, and Nitrogen Oxides. Each Panel Includes 37 Points with Each Point Represent One Vehicle.

NO<sub>x</sub> approach to steady-state time statistically significantly linearly increases with vehicle mileage, with an R-square of 0.22. No statistically significant linear relationships with vehicle mileage were observed for each of cold start approach to steady-state time for fuel use, CO, and HC.

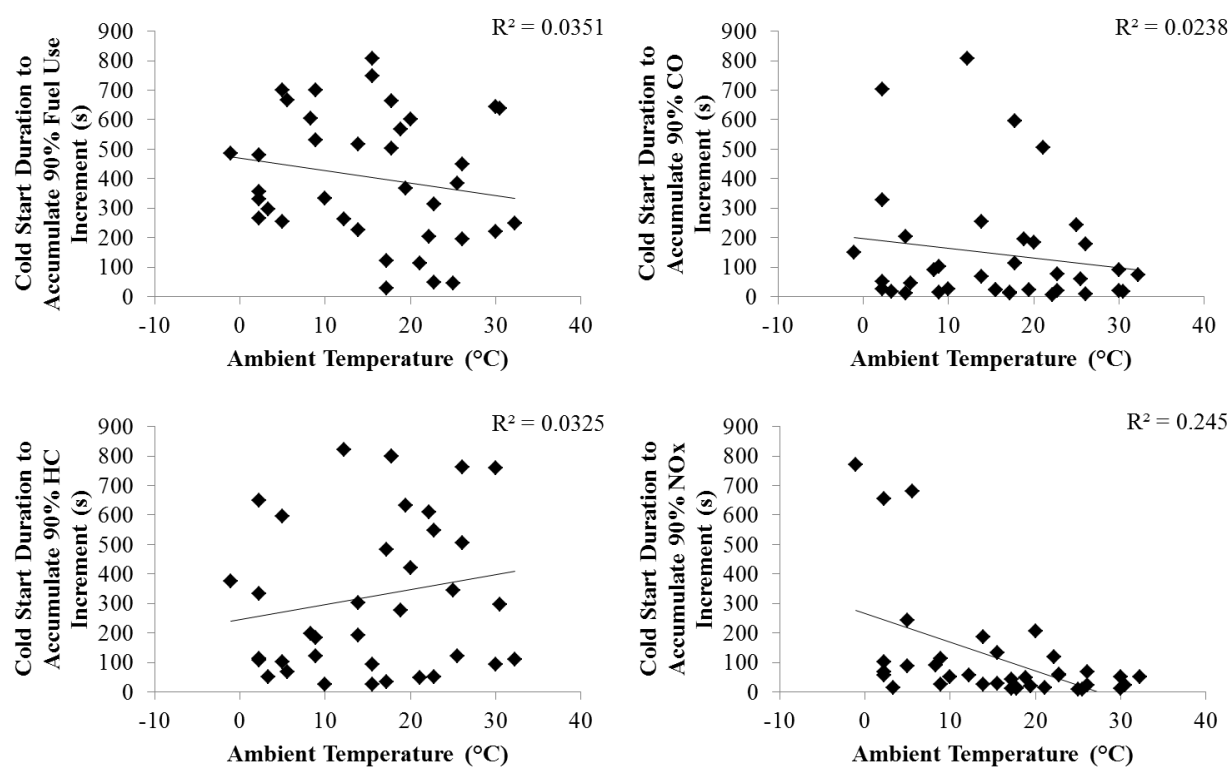

**Figure S17.** Scatter Plot of Cold Start Duration to Accumulate 90% Cold Start Increment versus Ambient Temperature for All Measured Vehicles for Each of Fuel Use, Carbon Monoxide, Hydrocarbon, and Nitrogen Oxides. Each Panel Includes 37 Points with Each Point Represent One Vehicle.

No statistically significant linear relationships with ambient temperature were observed for each of cold start approach to steady-state time for CO, HC, and NO<sub>x</sub>.

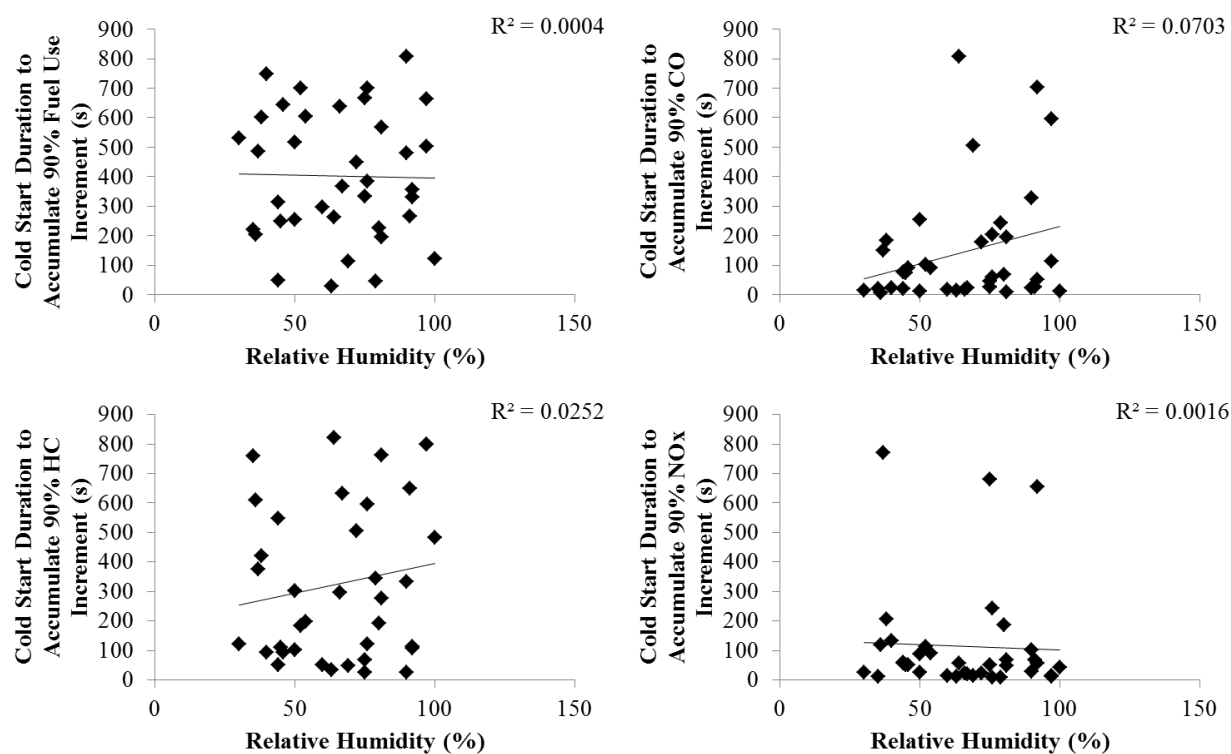

**Figure S18.** Scatter Plot of Cold Start Duration to Accumulate 90% Cold Start Increment versus Relative Humidity for All Measured Vehicles for Each of Fuel Use, Carbon Monoxide, Hydrocarbon, and Nitrogen Oxides. Each Panel Includes 37 Points with Each Point Represent One Vehicle.

No statistically significant linear relationships with relative humidity were observed for each of cold start approach to steady-state time for fuel use, CO, HC, and NO<sub>x</sub>.

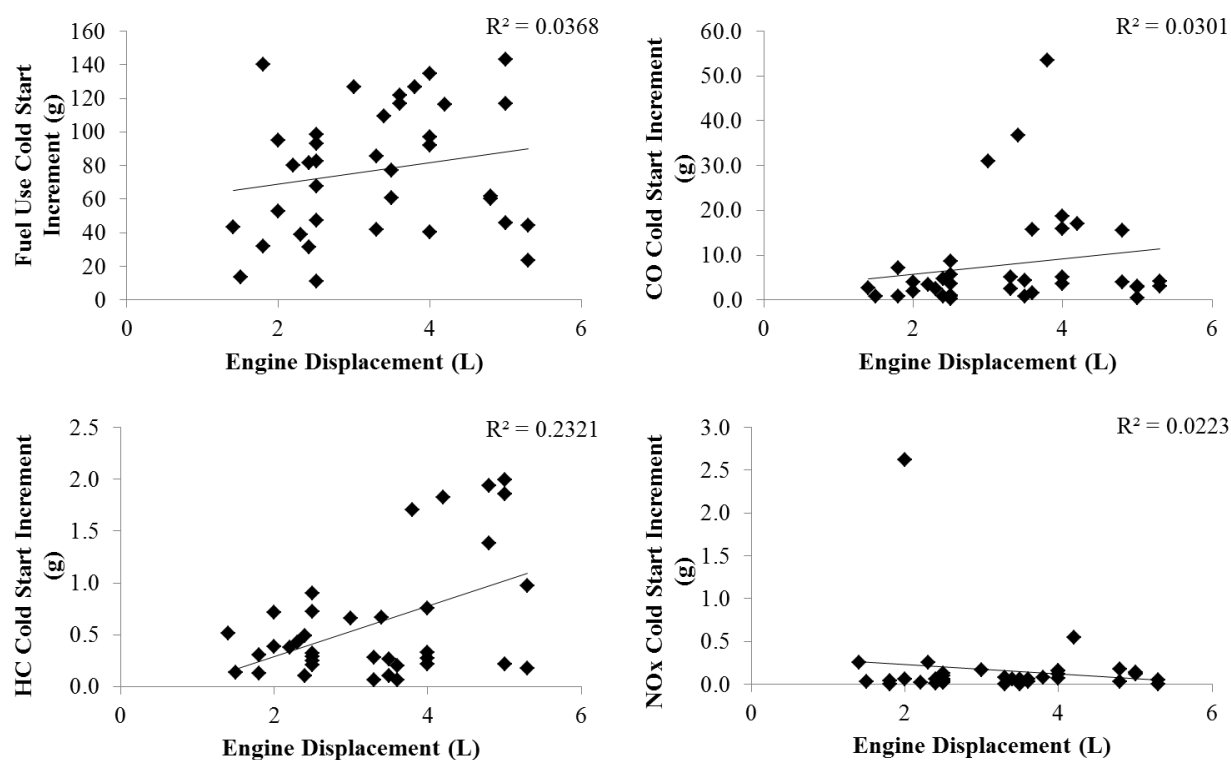

**Figure S19.** Scatter Plot of Cold Start Increment versus Engine Displacement for All Measured Vehicles for Each of Fuel Use, Carbon Monoxide, Hydrocarbon, and Nitrogen Oxides. Each Panel Includes 37 Points with Each Point Represent One Vehicle.

HC cold start increment statistically significantly linearly increases with engine displacement, with an R-square of 0.23. No statistically significant linear relationships with engine displacement were observed for each of cold start increment for fuel use, CO, and NO<sub>x</sub>.

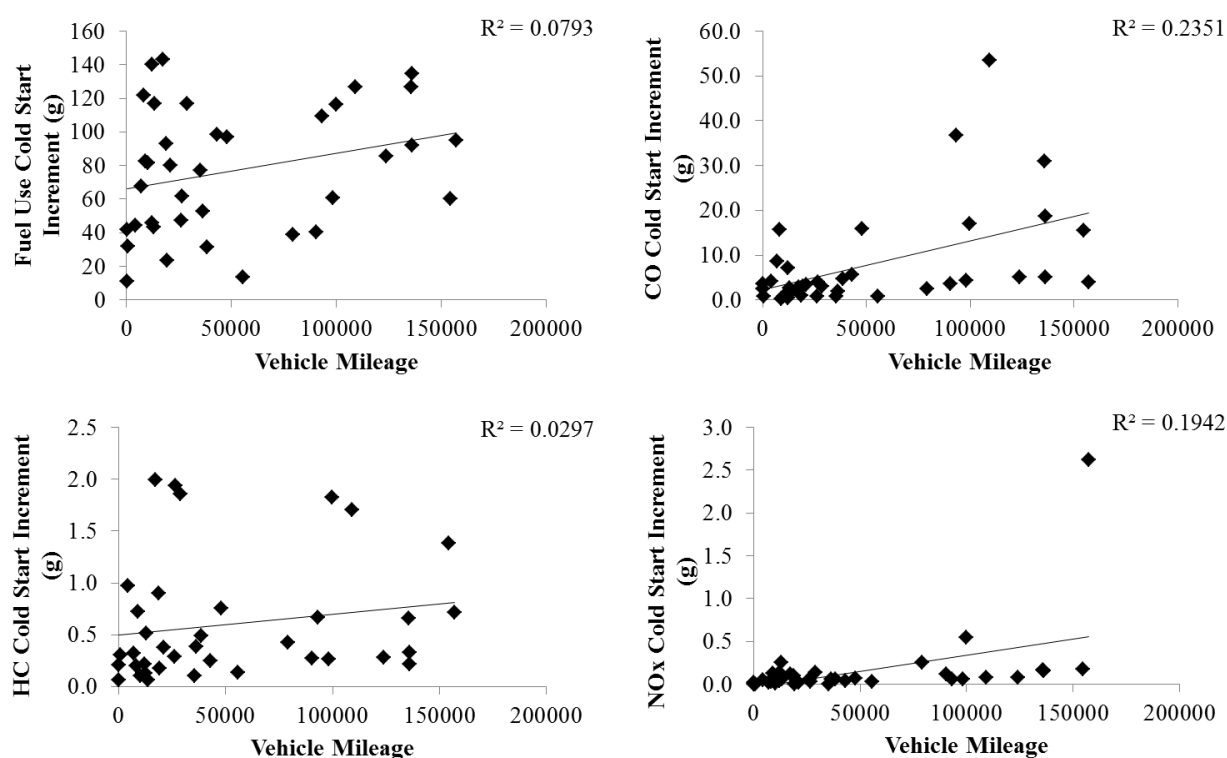

**Figure S20.** Scatter Plot of Cold Start Increment versus Vehicle Mileage for All Measured Vehicles for Each of Fuel Use, Carbon Monoxide, Hydrocarbon, and Nitrogen Oxides. Each Panel Includes 37 Points with Each Point Represent One Vehicle.

CO and NO<sub>x</sub> cold start increment statistically significantly linearly increases with vehicle mileage, with R-squares of 0.23 and 0.19, respectively. No statistically significant linear relationships with vehicle mileage were observed for each of cold start increment for fuel use and HC.

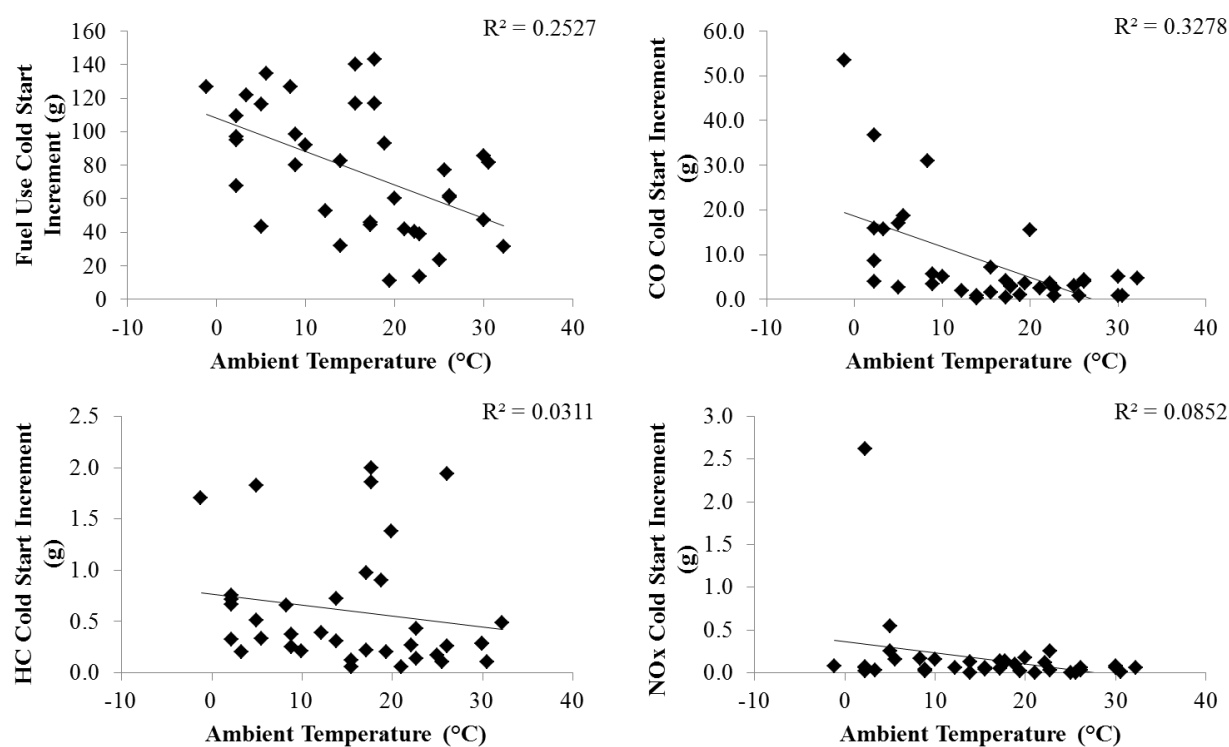

**Figure S21.** Scatter Plot of Cold Start Increment versus Ambient Temperature for All Measured Vehicles for Each of Fuel Use, Carbon Monoxide, Hydrocarbon, and Nitrogen Oxides. Each Panel Includes 37 Points with Each Point Represent One Vehicle.

Fuel use and CO cold start increments statistically significantly linearly decrease with ambient temperatures, with R-squares of 0.26 and 0.34, respectively. No statistically significant linear relationships with ambient temperature were observed for each of cold start increment for HC and NO<sub>x</sub>.

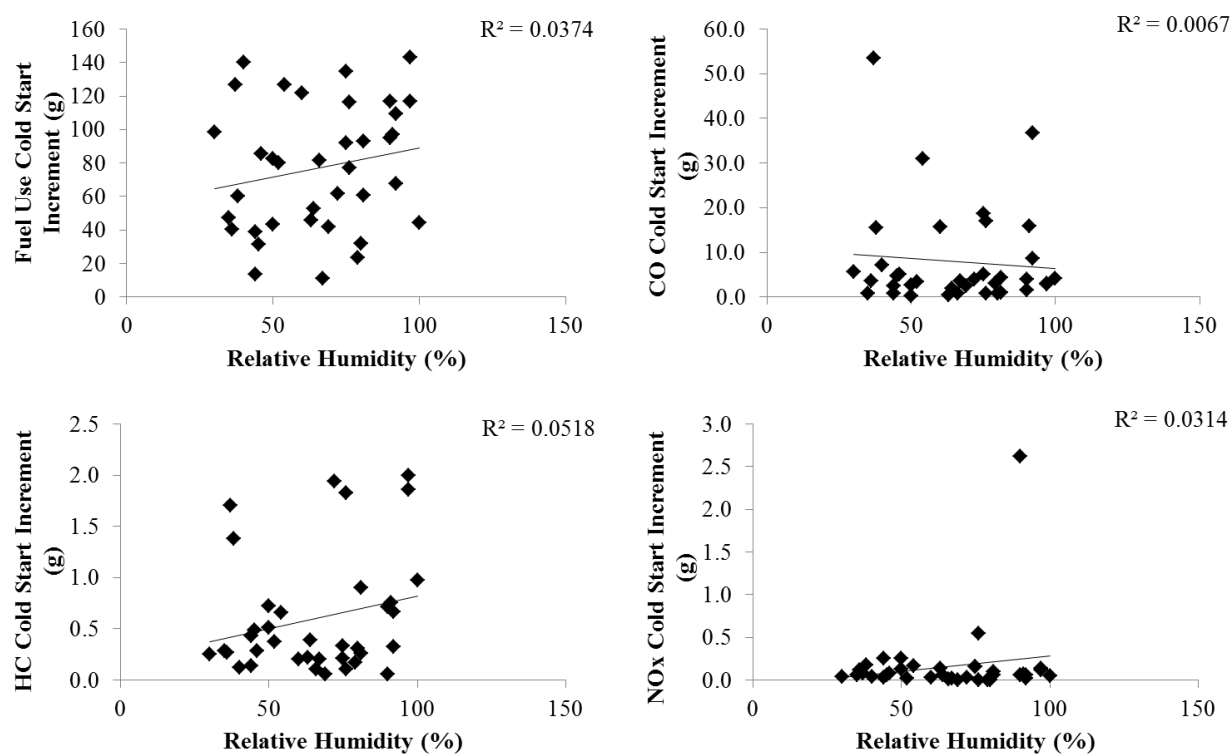

**Figure S22.** Scatter Plot of Cold Start Increment versus Relative Humidity for All Measured Vehicles for Each of Fuel Use, Carbon Monoxide, Hydrocarbon, and Nitrogen Oxides. Each Panel Includes 37 Points with Each Point Represent One Vehicle.

No statistically significant linear relationships with relative humidity were observed for each of cold start increment for fuel use, CO, HC, and NO<sub>x</sub>.

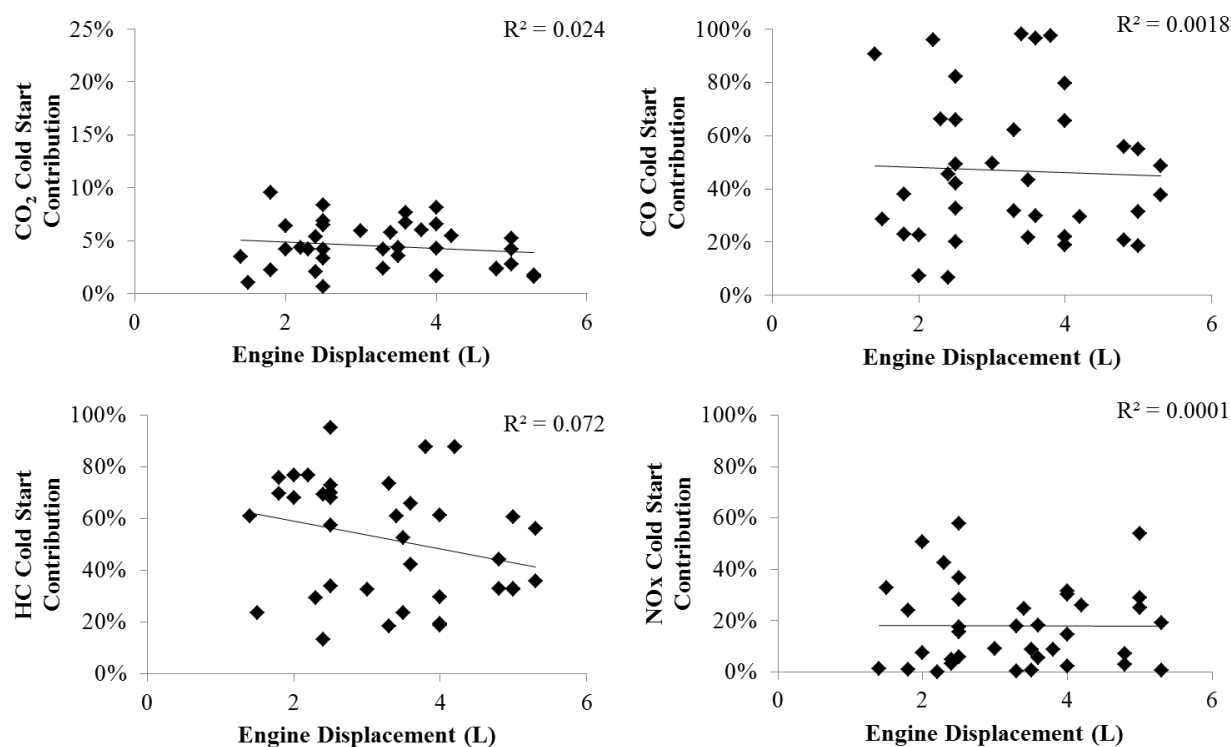

**Figure S23.** Scatter Plot of Idle Cold Start Contribution versus Engine Displacement for All Measured Vehicles for Each of Carbon Dioxide, Carbon Monoxide, Hydrocarbon, and Nitrogen Oxides. Each Panel Includes 37 Points with Each Point Represent One Vehicle.

No statistically significant linear relationships with engine displacement were observed for each of idle cold start contributions for CO<sub>2</sub>, CO, HC, and NO<sub>x</sub>.

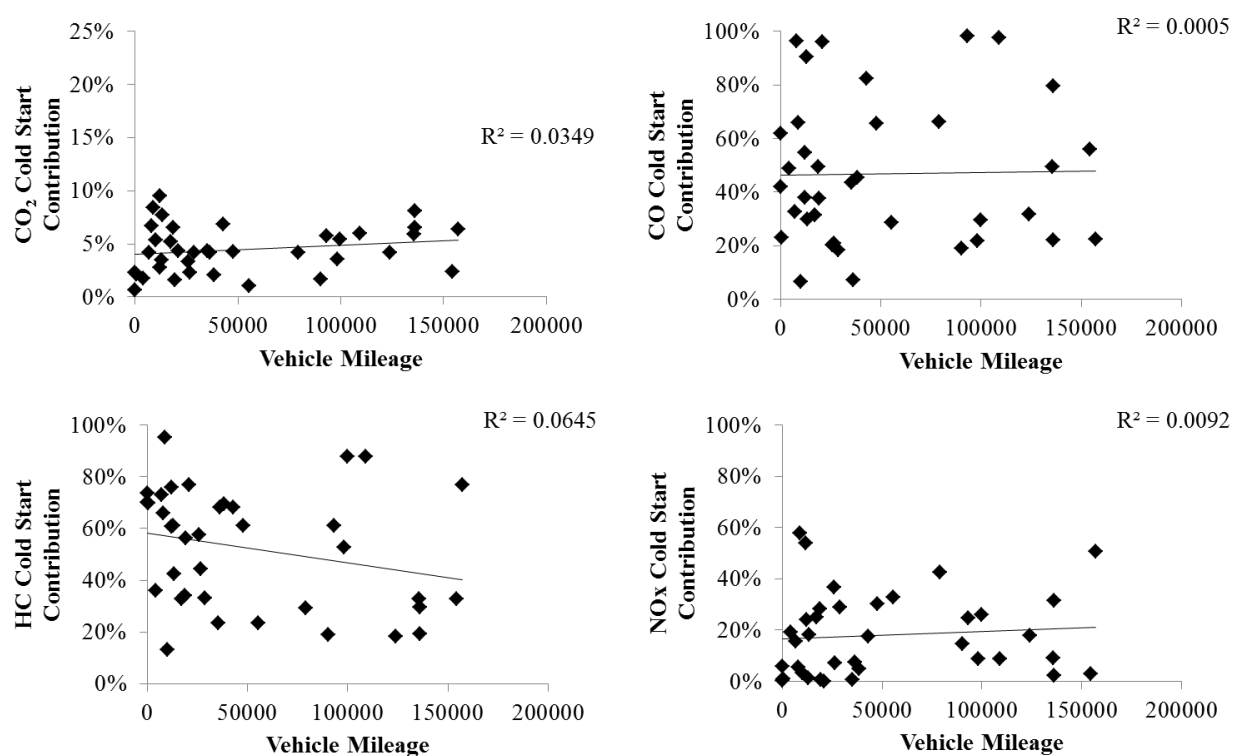

**Figure S24.** Scatter Plot of Idle Cold Start Contribution versus Vehicle Mileage for All Measured Vehicles for Each of Carbon Dioxide, Carbon Monoxide, Hydrocarbon, and Nitrogen Oxides. Each Panel Includes 37 Points with Each Point Represent One Vehicle.

No statistically significant linear relationships with vehicle mileage were observed for each of idle cold start contributions for CO<sub>2</sub>, CO, HC, and NO<sub>x</sub>.

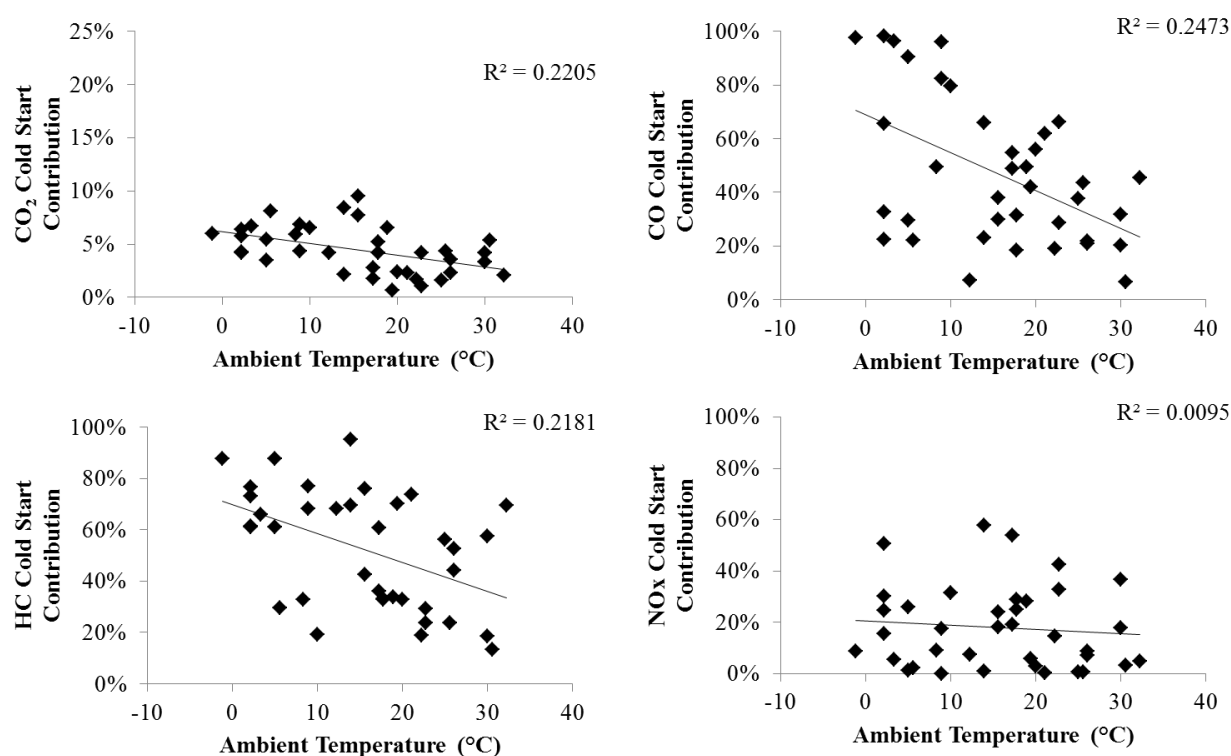

**Figure S25.** Scatter Plot of Idle Cold Start Contribution versus Ambient Temperature for All Measured Vehicles for Each of Carbon Dioxide, Carbon Monoxide, Hydrocarbon, and Nitrogen Oxides. Each Panel Includes 37 Points with Each Point Represent One Vehicle.

CO<sub>2</sub>, CO, and HC idle cold start contributions statistically significantly linearly decrease with ambient temperatures, with R-squares of 0.22, 0.25, and 0.22, respectively. No statistically significant linear relationships with ambient temperature were observed for idle cold start contributions for NO<sub>x</sub>.

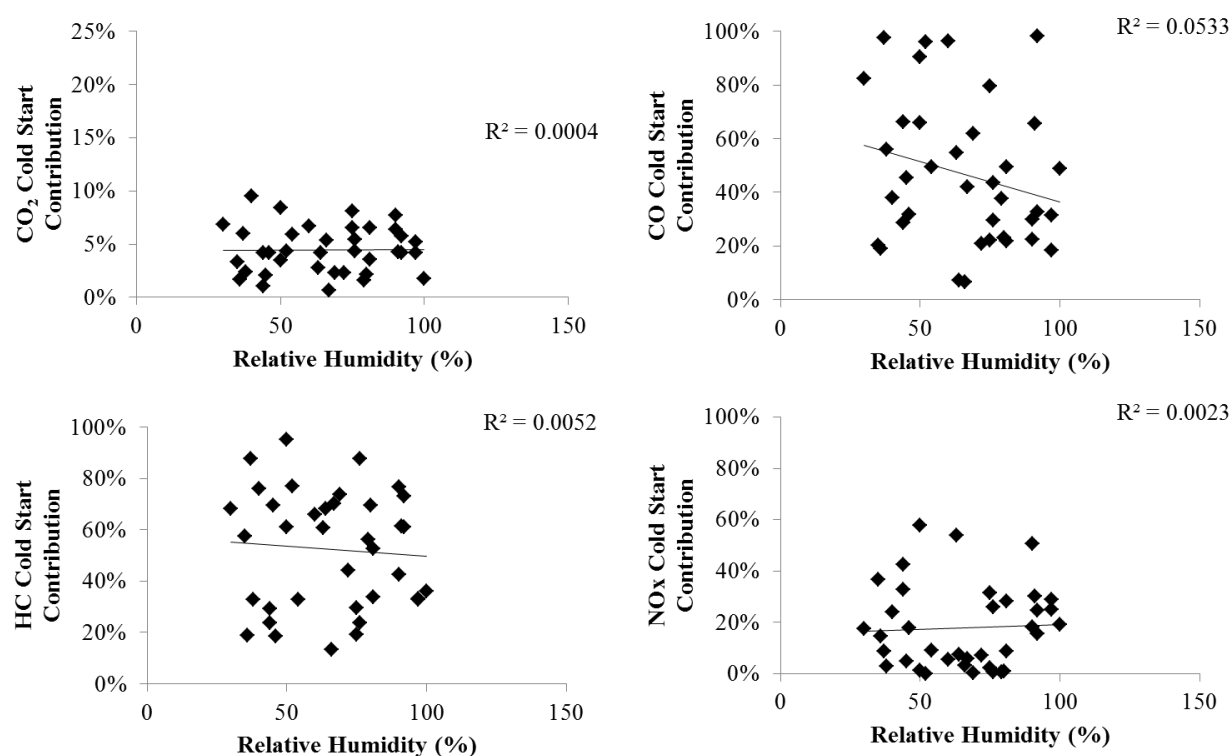

**Figure S26.** Scatter Plot of Idle Cold Start Contribution versus Relative Humidity for All Measured Vehicles for Each of Carbon Dioxide, Carbon Monoxide, Hydrocarbon, and Nitrogen Oxides. Each Panel Includes 37 Points with Each Point Represent One Vehicle.

No statistically significant linear relationships with relative humidity were observed for each of idle cold start contributions for CO<sub>2</sub>, CO, HC, and NO<sub>x</sub>.

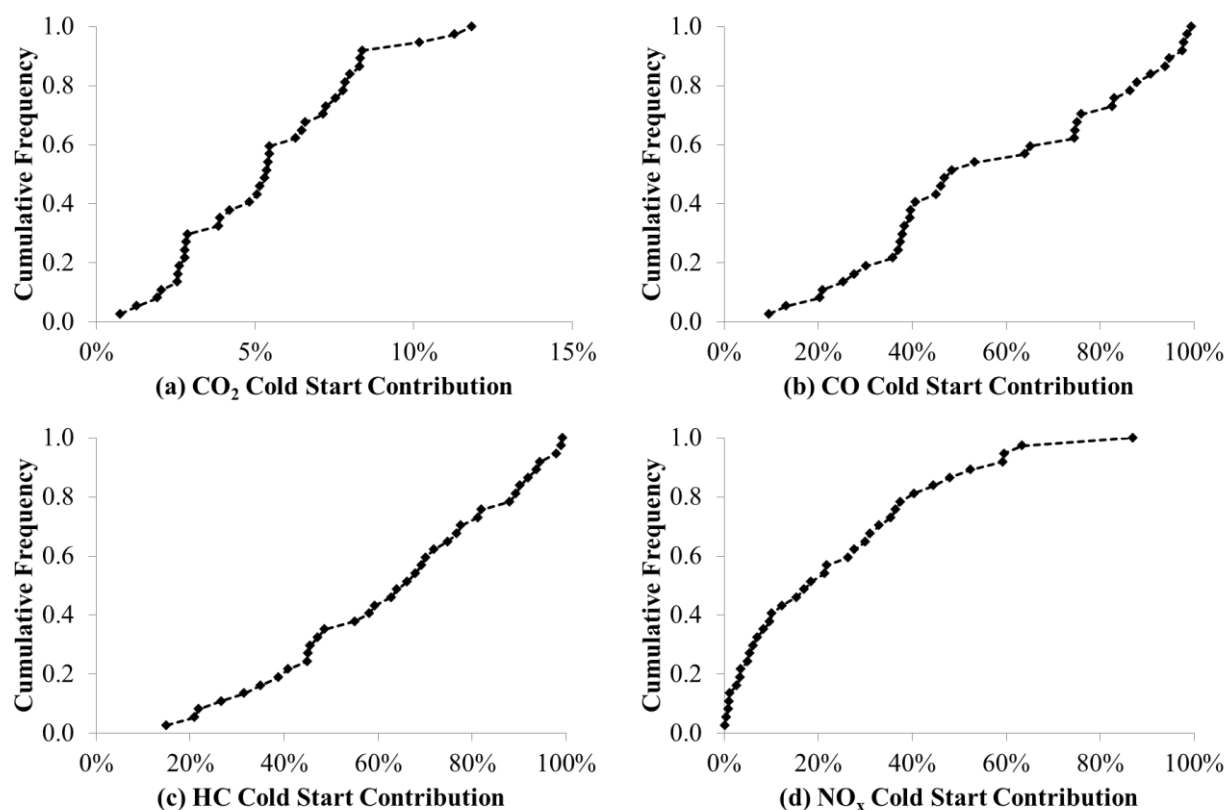

**Figure S27.** Cumulative Frequency of Cold Start Contributions of Carbon Dioxide, Carbon Monoxide, Hydrocarbon, and Nitrogen Oxides Based on Measured Data for Route A. Each Point Represents One Vehicle, with Average Cold Start Contribution over 2 one-way trips of Route A. Each Panel Includes 37 Points with Each Point Represent One Vehicle.

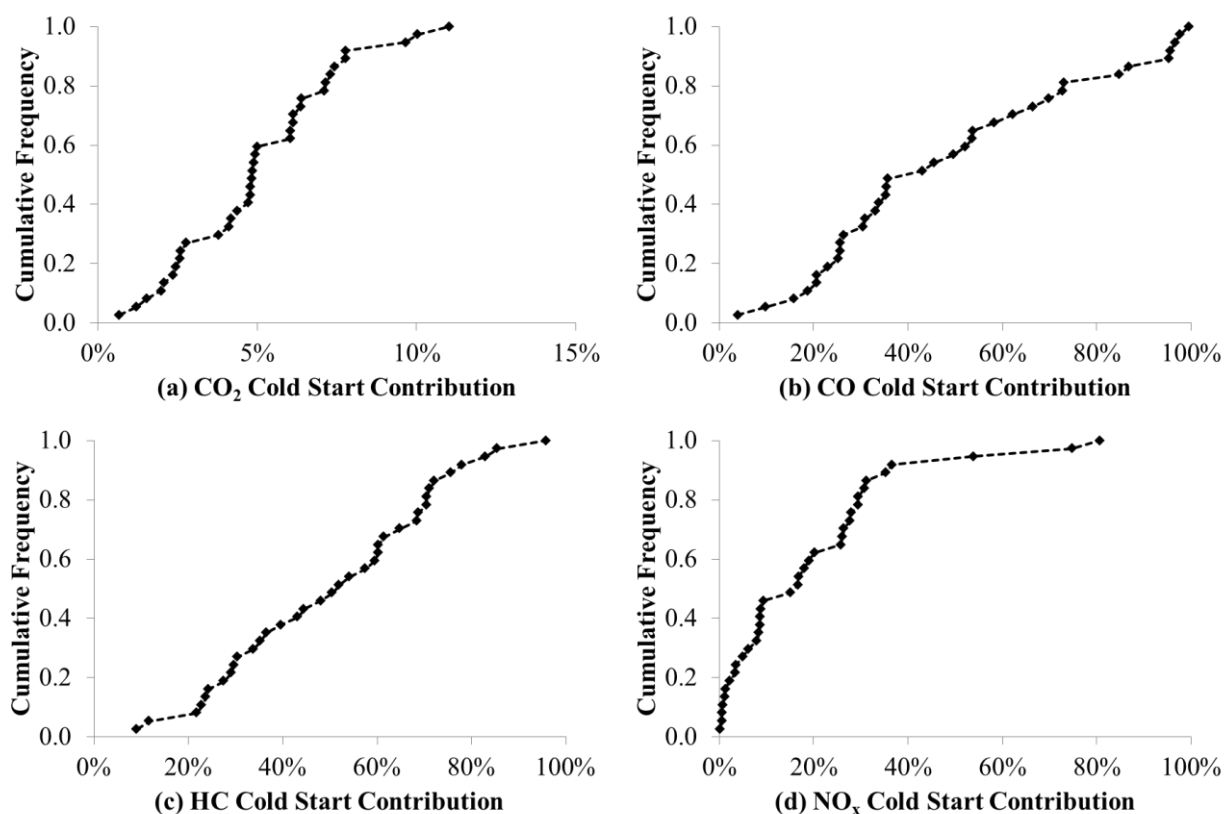

**Figure S28.** Cumulative Frequency of Cold Start Contributions of Carbon Dioxide, Carbon Monoxide, Hydrocarbon, and Nitrogen Oxides Based on Measured Data for Route C. Each Point Represents One Vehicle, with Average Cold Start Contribution over 2 one-way trips of Route C. Each Panel Includes 37 Points with Each Point Represent One Vehicle.

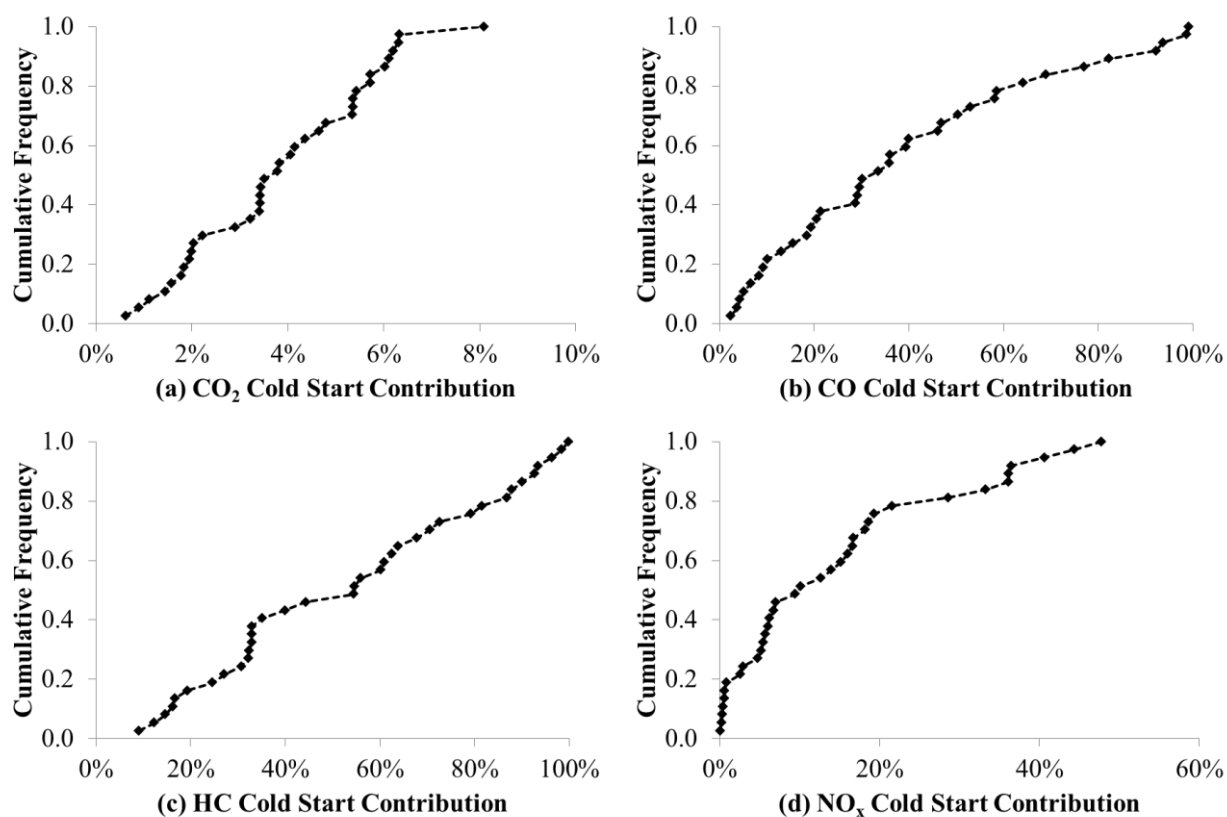

**Figure S29.** Cumulative Frequency of Cold Start Contributions of Carbon Dioxide, Carbon Monoxide, Hydrocarbon, and Nitrogen Oxides Based on Measured Data for Route 1. Each Point Represents One Vehicle, with Average Cold Start Contribution over 2 one-way trips of Route 1. Each Panel Includes 37 Points with Each Point Represent One Vehicle.

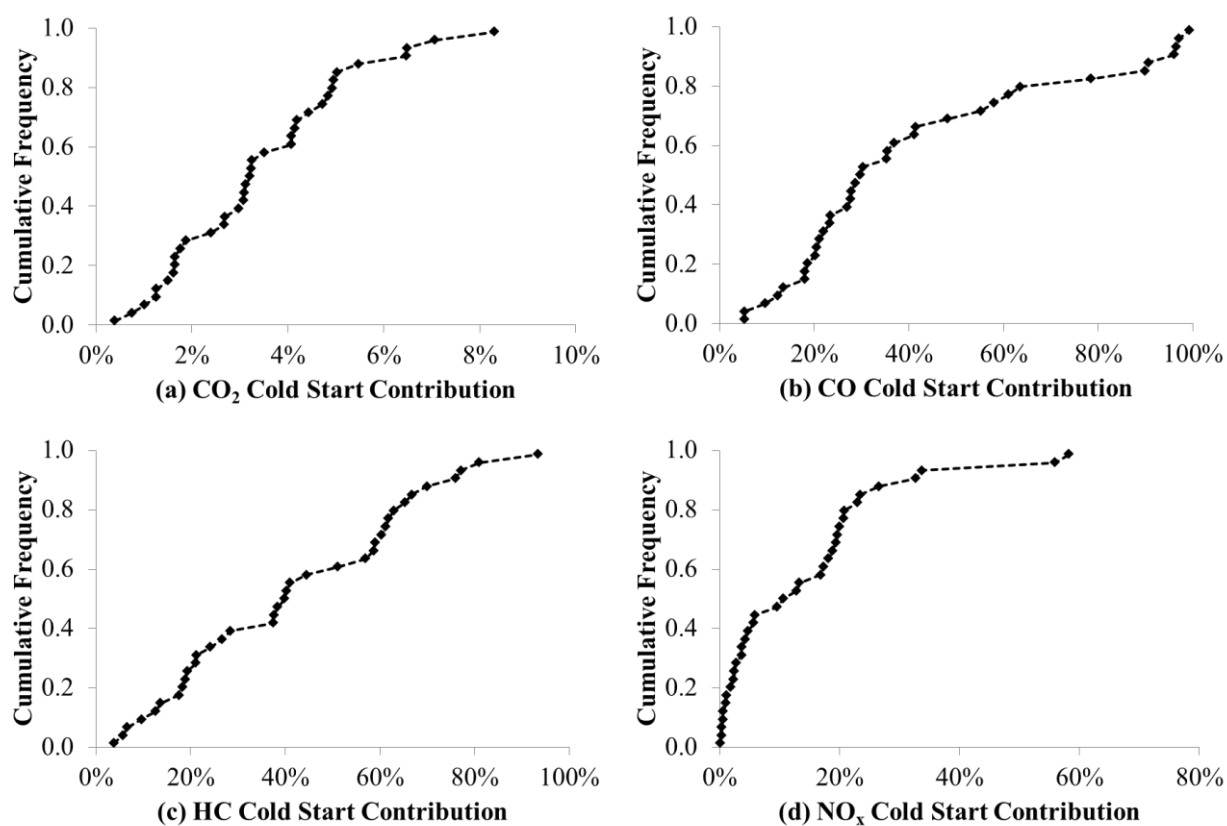

**Figure S30.** Cumulative Frequency of Cold Start Contributions of Carbon Dioxide, Carbon Monoxide, Hydrocarbon, and Nitrogen Oxides Based on Measured Data for Route 3. Each Point Represents One Vehicle, with Average Cold Start Contribution over 2 one-way trips of Route 3. Each Panel Includes 37 Points with Each Point Represent One Vehicle.

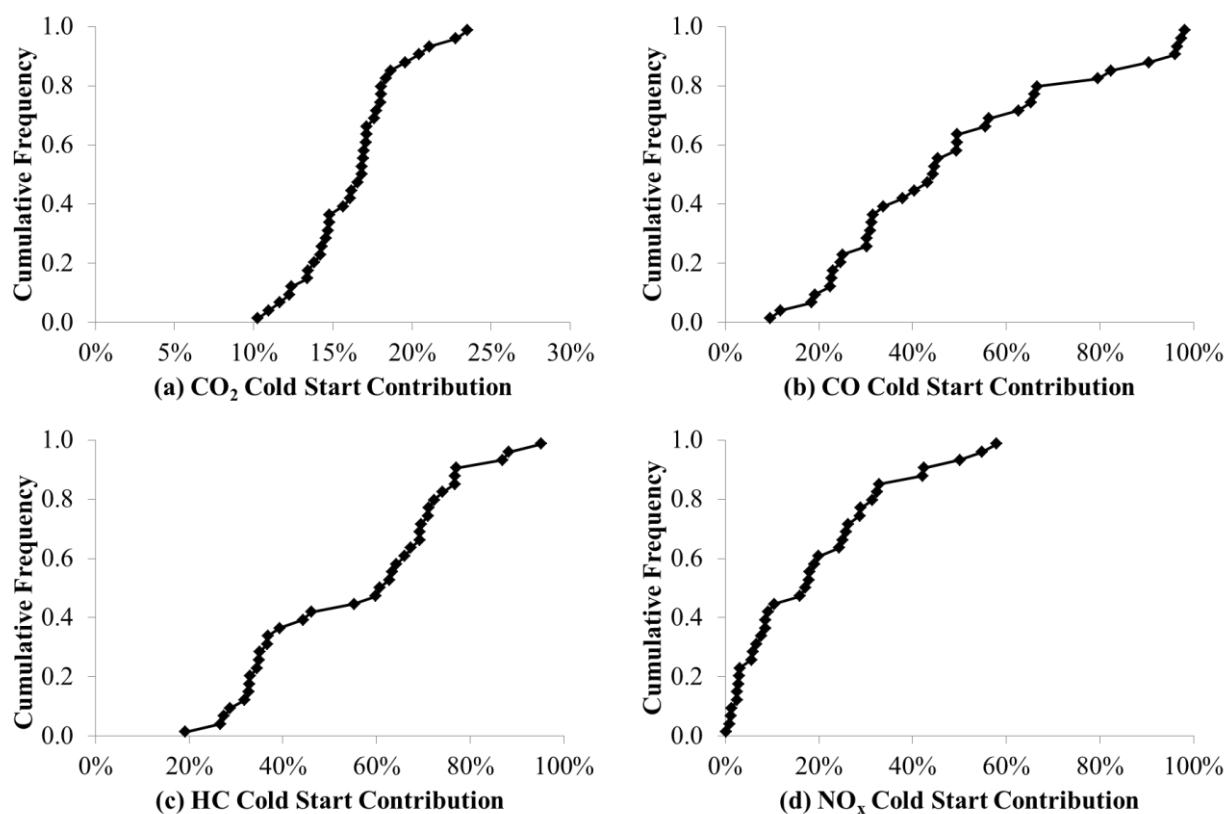

**Figure S31.** Cumulative Frequency of Idle Cold Start Contributions of Carbon Dioxide, Carbon Monoxide, Hydrocarbon, and Nitrogen Oxides Based on 15 Minutes Idling Total Emissions. Each Panel Includes 37 Points. Each Point Represents One Vehicle, with Average Cold Start Contribution over 8 One-Way Trips.

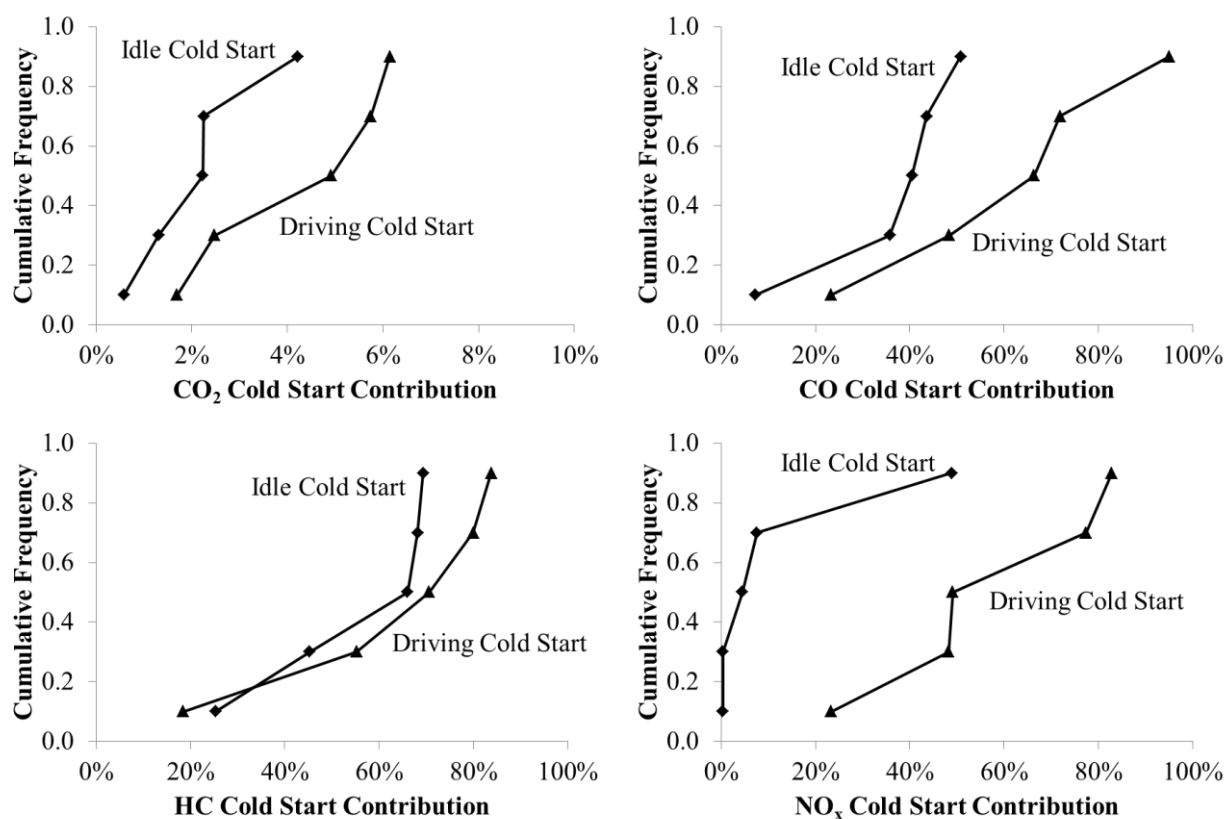

**Figure S32.** Cumulative Frequency of Idle versus Driving Cold Start Contributions of Carbon Dioxide, Carbon Monoxide, Hydrocarbon, and Nitrogen Oxides Based on Measured Data and MOVES Estimates. Each Panel Includes 5 Points. Each Point Represents One Vehicle that was Measured for Both Idle and Driving Cold Start, with Average Cold Start Contribution over 8 One-Way Trips.
